# Supplementary material
Source: MDPI journal article supplement (https://www.mdpi.com/1099-4300/21/2/171)
Supplement: s1 [file s1]

**Table S1.** Conjectured complete list of tight Bell+1 inequalities with three settings for both parties. The coefficients for each inequality are given in the following order  $d_{00} d_{01} d_{02} d_{10} d_{11} d_{12} d_{20} d_{21} d_{22} e_{00} e_{01} e_{02} e_{10} e_{11} e_{12} e_{20} e_{21} e_{22} f_0 f_1 f_2$ . For each inequality we give the local bound  $L$ , the two-qubit quantum bound  $Q$ , the one bit of communication bound  $C$  and the quantum state that achieves the largest quantum bound  $|\psi(\theta_{\max})\rangle = \cos \theta_{\max}|00\rangle + \sin \theta_{\max}|11\rangle$ . All quantities are computed for non-degenerate measurements.

| #  | Ineq                                                   | $L$ | $Q$    | $C$ | $\theta_{\max}/\pi$ |
|----|--------------------------------------------------------|-----|--------|-----|---------------------|
| 1  | -9 6 8 9 1 9 4 6 -5 3 -5 -5 -3 -1 -3 -1 -1 -1 0 -10 -4 | 1   | 1      | 4   | 0                   |
| 2  | -8 6 8 8 -2 8 4 6 -2 3 -5 -5 -3 -1 -3 -1 -1 -1 0 -8 -4 | 1   | 1      | 4   | 0                   |
| 3  | -8 6 8 8 0 8 4 6 -4 3 -5 -5 -3 -1 -3 -1 -1 -1 0 -8 -4  | 1   | 1      | 4   | 0                   |
| 4  | -7 5 6 7 1 6 3 5 -4 3 -4 -4 -3 -1 -2 -1 -1 0 0 -7 -3   | 1   | 1      | 3   | 0                   |
| 5  | -6 5 6 6 -1 6 3 5 -2 3 -4 -4 -3 -1 -2 -1 -1 0 0 -6 -3  | 1   | 1      | 3   | 0                   |
| 6  | -6 5 6 6 0 6 3 5 -3 3 -4 -4 -3 -1 -2 -1 -1 0 0 -6 -3   | 1   | 1      | 3   | 0                   |
| 7  | -5 2 5 0 0 0 5 0 5 1 -2 -2 1 2 -3 -1 -2 -3 0 0 -5      | 1   | 1      | 3   | 0                   |
| 8  | -5 2 5 0 1 -1 5 0 5 1 -2 -2 1 1 -2 -1 -2 -3 0 0 -5     | 1   | 1      | 3   | 0                   |
| 9  | -5 2 5 1 2 -2 5 0 5 1 -2 -2 0 0 -1 -1 -2 -3 0 0 -5     | 1   | 1      | 3   | 0                   |
| 10 | -5 2 5 5 1 6 0 0 0 1 -2 -2 -1 -2 -3 1 2 -3 0 -6 0      | 1   | 1      | 3   | 0                   |
| 11 | -5 2 5 5 1 6 0 1 -1 1 -2 -2 -1 -2 -3 1 1 -2 0 -6 0     | 1   | 1      | 3   | 0                   |
| 12 | -5 2 5 5 1 6 1 2 -2 1 -2 -2 -1 -2 -3 0 0 -1 0 -6 0     | 1   | 1      | 3   | 0                   |
| 13 | -5 2 5 5 2 7 1 2 -3 1 -2 -2 -1 -2 -3 0 0 -1 0 -7 0     | 1   | 1      | 3   | 0                   |
| 14 | -5 2 7 5 2 5 0 0 0 1 -2 -3 -1 -2 -2 -1 2 -4 -2 -5 0    | 0   | 0      | 2   | 0                   |
| 15 | -5 2 7 5 2 5 0 2 -2 1 -2 -3 -1 -2 -2 -1 0 -2 -2 -5 0   | 0   | 0      | 2   | 0                   |
| 16 | -5 3 6 5 0 5 2 2 0 1 -3 -3 -1 -1 -2 -1 1 -3 -1 -5 -2   | 0   | 0      | 2   | 0                   |
| 17 | -5 3 6 5 0 5 2 3 -1 1 -3 -3 -1 -1 -2 -1 0 -2 -1 -5 -2  | 0   | 0      | 2   | 0                   |
| 18 | -5 4 4 4 -3 4 5 5 1 1 -3 -3 -1 -1 -1 -1 -1 -1 0 -4 -6  | 0   | 0.0899 | 2   | 0.1448              |
| 19 | -5 4 6 5 1 5 2 4 -3 1 -3 -3 -1 -1 -1 -1 -1 -1 -2 -6 -2 | 0   | 0      | 2   | 0                   |
| 20 | -5 5 7 5 0 5 3 3 0 2 -4 -4 -2 -1 -1 -2 1 -3 -2 -5 -3   | 0   | 0      | 2   | 0                   |
| 21 | -5 5 7 5 0 5 3 5 -2 2 -4 -4 -2 -1 -1 -2 -1 -1 -2 -5 -3 | 0   | 0.0045 | 2   | 0.2044              |
| 22 | -5 6 7 5 2 5 3 6 -6 1 -2 -3 -1 -2 -2 -4 -4 2 -6 -5 0   | 0   | 0.044  | 2   | 0.1871              |
| 23 | -5 7 7 4 -4 7 5 5 0 2 -4 -4 -3 1 -3 -2 -1 -1 -4 -3 -5  | 0   | 0.0844 | 2   | 0.2235              |
| 24 | -4 1 5 4 2 4 -1 2 -2 1 -1 -2 -1 -2 -2 0 0 -1 -1 -4 0   | 0   | 0.3467 | 2   | 0.1895              |
| 25 | -4 2 4 4 0 4 1 1 0 1 -2 -2 -1 -1 -2 0 1 -2 0 -4 -1     | 0   | 0.3106 | 2   | 0.1655              |
| 26 | -4 2 4 4 0 4 1 2 -1 1 -2 -2 -1 -1 -2 0 0 -1 0 -4 -1    | 0   | 0.3033 | 2   | 0.1639              |
| 27 | -4 2 6 0 0 0 0 2 -2 1 -1 -2 3 -1 2 -1 -1 -2 -2 0 0     | 3   | 3      | 5   | 0                   |
| 28 | -4 2 6 0 2 -2 2 0 2 1 -1 -2 -1 -1 -2 1 -1 0 -2 0 -2    | 1   | 1      | 3   | 0                   |
| 29 | -4 3 2 2 0 2 2 3 -1 2 -2 -1 -2 -1 -1 0 -1 1 0 -2 -2    | 1   | 1      | 2   | 0                   |
| 30 | -4 3 3 2 -3 3 4 3 1 2 -2 -2 -1 1 -1 -2 -1 -1 0 -1 -4   | 1   | 1.0667 | 2   | 0.2167              |
| 31 | -4 3 3 2 -1 3 2 3 -1 2 -2 -1 -2 0 -2 0 -1 1 -1 -2 -2   | 1   | 1.1019 | 2   | 0.2144              |
| 32 | -4 3 3 3 -1 3 3 3 -1 2 -2 -2 -2 -1 -1 -1 -1 1 0 -3 -2  | 1   | 1      | 2   | 0                   |
| 33 | -4 3 3 4 1 3 1 1 -1 2 -2 -2 -2 -1 -1 0 1 -1 0 -4 -1    | 1   | 1      | 2   | 0                   |
| 34 | -4 3 3 4 1 3 1 2 -2 2 -2 -2 -2 -1 -1 0 0 0 0 -4 -1     | 1   | 1      | 2   | 0                   |
| 35 | -4 3 4 -1 -1 0 2 3 -1 2 -2 -2 2 0 2 -2 -1 -1 -1 1 -2   | 3   | 3      | 4   | 0                   |
| 36 | -4 3 4 2 1 1 2 3 -1 2 -2 -2 0 -1 1 -2 -1 -1 -1 -2 -2   | 1   | 1      | 2   | 0                   |
| 37 | -4 3 4 3 -4 4 4 4 1 2 -2 -2 -2 2 -2 -2 -2 -1 -1 -1 -4  | 1   | 1      | 2   | 0                   |
| 38 | -4 3 4 3 -2 4 3 3 -1 2 -2 -2 -2 0 -2 -1 -1 1 -1 -3 -2  | 1   | 1.0505 | 2   | 0.2262              |
| 39 | -4 3 5 2 3 3 2 5 -3 0 -1 -1 2 -3 1 -2 -2 -1 -3 -5 -2   | 1   | 1      | 3   | 0                   |
| 40 | -4 3 5 3 1 3 1 3 -2 1 -2 -2 0 -1 0 -1 -1 -1 -2 -4 -1   | 0   | 0.365  | 2   | 0.208               |
| 41 | -4 3 6 1 3 -2 3 -1 2 1 -2 -2 -1 -1 -2 0 -1 0 -2 -1 -2  | 1   | 1      | 3   | 0                   |
| 42 | -4 4 0 2 0 2 0 0 0 1 -1 1 -3 -3 -1 3 1 -1 0 -2 0       | 2   | 2      | 4   | 0                   |

|    |                                                        |   |        |   |        |
|----|--------------------------------------------------------|---|--------|---|--------|
| 43 | -4 4 0 2 0 2 2 2 -2 1 -1 1 -3 -3 -1 1 -1 1 0 -2 0      | 2 | 2      | 4 | 0      |
| 44 | -4 4 0 2 2 4 4 6 -4 1 -1 1 -1 -3 -3 -1 -3 3 0 -4 -2    | 2 | 2      | 4 | 0      |
| 45 | -4 4 0 4 2 2 0 0 0 1 -1 1 -3 -3 -1 3 1 -1 0 -4 0       | 2 | 2      | 4 | 0      |
| 46 | -4 4 0 4 2 2 2 2 -2 1 -1 1 -3 -3 -1 1 -1 1 0 -4 0      | 2 | 2      | 4 | 0      |
| 47 | -4 4 0 4 2 4 4 4 -4 1 -1 1 -3 -3 -3 -1 -3 3 0 -4 0     | 2 | 2.1102 | 4 | 0.1491 |
| 48 | -4 4 5 4 0 4 2 4 -2 2 -3 -3 -2 -1 -1 -1 -1 0 -1 -4 -2  | 0 | 0.4426 | 2 | 0.2234 |
| 49 | -4 4 5 5 -1 5 3 4 -2 1 -3 -3 -2 0 -2 -1 -1 -1 -1 -4 -3 | 0 | 0      | 2 | 0      |
| 50 | -4 4 6 4 0 4 2 2 0 1 -3 -3 -1 -1 -1 -1 1 -3 -2 -4 -2   | 0 | 0      | 2 | 0      |
| 51 | -4 4 6 6 -2 6 4 4 -2 1 -3 -3 -3 1 -3 -1 -1 -1 -2 -4 -4 | 0 | 0      | 2 | 0      |
| 52 | -4 4 7 4 1 4 1 4 -3 1 -3 -3 -1 -2 -1 -1 -1 -1 -3 -4 -1 | 0 | 0      | 2 | 0      |
| 53 | -4 4 7 7 -3 7 5 5 -2 1 -3 -3 -4 2 -4 -1 -2 -1 -3 -4 -5 | 0 | 0      | 2 | 0      |
| 54 | -4 4 8 0 0 0 2 6 -4 1 -1 -2 3 -3 2 -3 -3 -2 -4 0 -2    | 2 | 2      | 5 | 0      |
| 55 | -4 4 8 2 6 -4 2 -2 2 1 -1 -2 -3 -3 -2 1 -1 0 -4 -2 0   | 2 | 2      | 5 | 0      |
| 56 | -4 5 7 2 -1 3 2 5 -3 2 -3 -3 0 -1 0 -2 -2 -1 -3 -2 -2  | 1 | 1      | 3 | 0      |
| 57 | -4 6 6 4 -4 6 4 4 0 1 -3 -3 -3 1 -3 -1 -1 -1 -4 -2 -4  | 0 | 0.1239 | 2 | 0.2228 |
| 58 | -4 6 7 5 -5 7 5 5 0 1 -3 -3 -4 2 -4 -1 -2 -1 -5 -2 -5  | 0 | 0.0913 | 2 | 0.2154 |
| 59 | -3 -2 -3 5 -2 5 5 2 -5 0 4 4 -3 -2 -1 -2 -2 1 5 -5 0   | 6 | 6      | 8 | 0      |
| 60 | -3 0 3 -1 0 -1 1 0 1 1 0 -1 0 0 -1 1 0 0 0 1 -1        | 2 | 2      | 3 | 0      |
| 61 | -3 0 3 0 0 0 -1 0 -1 1 0 -1 2 0 1 0 0 -1 0 0 1         | 3 | 3      | 4 | 0      |
| 62 | -3 0 3 0 0 0 0 0 0 1 0 -1 2 0 1 -1 0 -2 0 0 0          | 2 | 2      | 3 | 0      |
| 63 | -3 0 3 1 -1 1 0 0 0 1 -1 -2 1 1 1 -1 1 -1 0 -1 0       | 2 | 2      | 3 | 0      |
| 64 | -3 0 3 2 1 2 -1 1 -1 1 0 -1 0 -1 -1 0 0 -1 0 -2 0      | 1 | 1      | 2 | 0      |
| 65 | -3 0 3 3 1 3 0 0 0 1 -1 -2 -1 -1 -1 -1 1 -1 0 -3 0     | 0 | 0      | 1 | 0      |
| 66 | -3 0 3 3 2 3 -1 2 -2 1 0 -1 -1 -2 -2 0 0 0 0 -3 0      | 1 | 1      | 2 | 0      |
| 67 | -3 1 2 2 0 2 1 0 1 1 -1 0 -1 -1 -2 1 1 -1 0 -2 -1      | 1 | 1.0391 | 2 | 0.1059 |
| 68 | -3 1 2 2 0 2 1 1 0 1 -1 0 -1 -1 -2 1 0 0 0 -2 -1       | 1 | 1.0053 | 2 | 0.0616 |
| 69 | -3 1 2 3 -1 2 1 1 0 1 -1 0 -2 0 -2 1 0 0 0 -2 -1       | 1 | 1.0117 | 2 | 0.1016 |
| 70 | -3 1 3 0 -1 -1 1 1 0 1 -1 -1 2 0 2 -1 0 -2 0 1 -1      | 3 | 3      | 4 | 0      |
| 71 | -3 1 3 0 0 0 1 1 0 1 -1 -1 2 -1 1 -1 0 -2 0 0 -1       | 2 | 2      | 3 | 0      |
| 72 | -3 1 3 0 0 0 4 0 4 0 -1 -1 1 1 -2 -1 -1 -2 0 0 -4      | 0 | 0.2003 | 2 | 0.1594 |
| 73 | -3 1 3 0 1 -1 1 0 1 1 0 -1 -1 -1 -1 1 0 0 -1 0 -1      | 1 | 1.0099 | 2 | 0.0873 |
| 74 | -3 1 3 0 1 -1 1 1 0 1 0 -1 -1 -1 -1 1 -1 1 -1 0 -1     | 1 | 1.0641 | 2 | 0.1558 |
| 75 | -3 1 3 1 0 1 1 1 0 1 -1 -1 1 -1 0 -1 0 -2 0 -1 -1      | 1 | 1      | 2 | 0      |
| 76 | -3 1 3 1 1 -1 3 0 3 1 -1 -1 0 0 0 -1 -1 -2 0 0 -3      | 1 | 1      | 2 | 0      |
| 77 | -3 1 3 1 1 -1 4 0 4 0 -1 -1 0 0 -1 -1 -1 -2 0 0 -4     | 0 | 0.1772 | 2 | 0.1512 |
| 78 | -3 1 3 1 1 0 2 -1 1 1 -1 -1 -1 0 -2 0 0 0 0 -1 -1      | 1 | 1      | 2 | 0      |
| 79 | -3 1 3 1 1 0 4 -1 3 1 -1 -1 1 0 -1 -2 0 -2 0 -1 -3     | 1 | 1      | 2 | 0      |
| 80 | -3 1 3 1 1 2 1 1 0 1 -1 -1 1 -1 0 -1 0 -2 0 -2 -1      | 1 | 1      | 2 | 0      |
| 81 | -3 1 3 2 1 -1 4 -1 3 1 -1 -1 0 0 0 -2 0 -2 0 -1 -3     | 1 | 1      | 2 | 0      |
| 82 | -3 1 3 3 -1 3 1 1 1 1 -1 -1 -1 -1 -2 1 1 -1 0 -3 -2    | 1 | 1      | 2 | 0      |
| 83 | -3 1 4 0 0 0 1 1 0 1 0 -1 2 -1 1 -2 0 -3 -1 0 -1       | 1 | 1      | 3 | 0      |
| 84 | -3 1 4 0 0 0 1 2 -1 1 0 -1 2 -1 1 -2 -1 -2 -1 0 -1     | 1 | 1.0595 | 3 | 0.1514 |
| 85 | -3 1 4 0 0 0 5 0 5 -1 -1 -1 1 1 -3 -1 -1 -2 -1 0 -5    | 0 | 0      | 2 | 0      |
| 86 | -3 1 4 1 1 -1 5 0 5 -1 -1 -1 0 0 -2 -1 -1 -2 -1 0 -5   | 0 | 0      | 2 | 0      |
| 87 | -3 1 4 1 1 0 1 -1 1 1 0 -1 -2 0 -3 1 0 0 -1 -1 0       | 1 | 1      | 3 | 0      |
| 88 | -3 1 4 1 2 -1 1 -1 1 1 0 -1 -2 -1 -2 1 0 0 -1 -1 0     | 1 | 1.084  | 3 | 0.1846 |
| 89 | -3 1 4 3 1 3 -1 3 -3 2 0 -2 -2 -2 -1 -1 -1 1 -1 -3 0   | 1 | 1      | 2 | 0      |
| 90 | -3 1 4 3 1 3 0 0 0 1 -1 -2 -1 -1 -1 -1 1 -2 -1 -3 0    | 0 | 0      | 1 | 0      |
| 91 | -3 2 1 1 0 1 1 0 1 1 -1 0 -1 -1 -1 1 1 -1 0 -1 -1      | 1 | 1.0811 | 2 | 0.1667 |
| 92 | -3 2 1 1 0 1 1 1 0 1 -1 0 -1 -1 -1 1 0 0 0 -1 -1       | 1 | 1.0099 | 2 | 0.0879 |

|     |                                                        |   |        |   |        |
|-----|--------------------------------------------------------|---|--------|---|--------|
| 93  | -3 2 1 1 0 1 2 2 -1 1 -1 0 -1 -1 -1 0 -1 1 0 -1 -1     | 1 | 1.0168 | 2 | 0.1554 |
| 94  | -3 2 1 3 2 3 1 2 -3 1 -1 0 -1 -1 -1 0 -1 1 0 -5 0      | 1 | 1.0719 | 2 | 0.2269 |
| 95  | -3 2 2 2 -3 2 3 3 1 1 -1 -1 -1 1 -1 -1 -1 -1 0 0 -4    | 1 | 1.0698 | 2 | 0.2233 |
| 96  | -3 2 2 2 -1 2 1 1 0 1 -1 0 -2 0 -2 1 0 0 -1 -1 -1      | 1 | 1.0057 | 2 | 0.0966 |
| 97  | -3 2 2 2 -1 2 1 1 1 1 -1 -1 -1 -1 -1 1 1 -1 0 -2 -2    | 1 | 1      | 2 | 0      |
| 98  | -3 2 2 2 -1 2 2 2 -1 1 -1 0 -2 0 -2 0 -1 1 -1 -1 -1    | 1 | 1.0967 | 2 | 0.1829 |
| 99  | -3 2 2 2 -1 2 3 3 -1 1 -1 -1 -1 -1 -1 -1 -1 1 0 -2 -2  | 1 | 1      | 2 | 0      |
| 100 | -3 2 3 -1 -1 -1 1 1 0 1 -1 -1 2 0 2 -1 0 -2 -1 2 -1    | 3 | 3      | 4 | 0      |
| 101 | -3 2 3 -1 -1 -1 1 2 -1 1 -1 -1 2 0 2 -1 -1 -1 -1 2 -1  | 3 | 3      | 4 | 0      |
| 102 | -3 2 3 0 0 0 1 2 -2 1 0 -1 2 0 1 -2 -2 0 -2 0 0        | 2 | 2      | 3 | 0      |
| 103 | -3 2 3 1 0 1 1 2 -2 1 0 -1 1 0 0 -2 -2 0 -2 -1 0       | 1 | 1.0031 | 2 | 0.0926 |
| 104 | -3 2 3 3 -2 3 3 2 1 1 -2 -2 -1 0 -1 -1 0 -1 0 -3 -3    | 0 | 0.1438 | 1 | 0.1796 |
| 105 | -3 2 3 3 -1 3 1 2 -1 1 -2 -2 -1 0 -1 0 0 0 0 -3 -1     | 1 | 1      | 2 | 0      |
| 106 | -3 2 3 3 -1 3 2 2 0 1 -2 -2 -1 0 -1 -1 0 -1 0 -3 -2    | 0 | 0.0772 | 1 | 0.1441 |
| 107 | -3 2 3 3 0 3 2 2 -1 1 -2 -2 -1 0 -1 -1 0 -1 0 -3 -2    | 0 | 0.0584 | 1 | 0.1316 |
| 108 | -3 2 3 3 2 3 1 4 -4 1 0 -1 -1 -2 -2 -2 -2 2 -2 -3 0    | 1 | 1      | 2 | 0      |
| 109 | -3 2 3 5 2 5 3 4 -5 -1 0 0 -1 -2 -1 -2 -2 1 -2 -7 0    | 1 | 1      | 3 | 0      |
| 110 | -3 2 4 0 0 0 1 3 -2 1 0 -1 2 -1 1 -2 -2 -1 -2 0 -1     | 1 | 1.1966 | 3 | 0.1881 |
| 111 | -3 2 4 1 3 -2 1 -1 1 1 0 -1 -2 -2 -1 1 0 0 -2 -1 0     | 1 | 1.253  | 3 | 0.2063 |
| 112 | -3 2 4 3 1 3 1 1 0 1 -2 -2 -1 -1 -1 -1 1 -2 -1 -3 -1   | 0 | 0      | 1 | 0      |
| 113 | -3 2 4 3 1 3 1 2 -1 1 -2 -2 -1 -1 -1 -1 0 -1 -1 -3 -1  | 0 | 0      | 1 | 0      |
| 114 | -3 2 4 4 -1 4 3 3 -1 1 -2 -2 -2 1 -2 -1 -1 -1 -1 -3 -3 | 0 | 0      | 1 | 0      |
| 115 | -3 2 5 0 0 0 5 -2 3 -1 -2 -2 1 2 -3 -1 0 -1 -2 0 -3    | 1 | 1      | 3 | 0      |
| 116 | -3 2 5 0 1 -1 5 -2 3 -1 -2 -2 1 1 -2 -1 0 -1 -2 0 -3   | 1 | 1      | 3 | 0      |
| 117 | -3 2 5 1 2 -2 5 -2 3 -1 -2 -2 0 0 -1 -1 0 -1 -2 0 -3   | 1 | 1      | 3 | 0      |
| 118 | -3 2 5 2 4 -2 1 0 -1 1 0 -1 -3 -2 -2 2 -2 2 -2 -2 0    | 2 | 2      | 4 | 0      |
| 119 | -3 3 0 2 2 3 3 3 -3 1 -1 0 -1 -2 -2 -1 -2 2 0 -3 -1    | 1 | 1      | 2 | 0      |
| 120 | -3 3 0 3 3 4 3 3 -4 1 -1 0 -1 -2 -2 -1 -2 2 0 -5 -1    | 1 | 1.0504 | 2 | 0.2267 |
| 121 | -3 3 1 1 -1 0 4 3 -1 1 -1 -1 1 0 1 -2 -2 0 0 0 -3      | 2 | 2      | 3 | 0      |
| 122 | -3 3 1 2 1 -1 2 1 1 1 -1 -1 0 0 0 -1 -2 0 0 -1 -2      | 1 | 1      | 2 | 0      |
| 123 | -3 3 1 3 2 2 2 1 -2 1 -1 -1 -1 -2 0 0 0 0 0 -4 -1      | 1 | 1      | 2 | 0      |
| 124 | -3 3 1 3 2 4 2 3 -4 1 -1 0 -1 -1 -2 -1 -2 2 -1 -5 0    | 1 | 1.0667 | 2 | 0.2169 |
| 125 | -3 3 2 -1 -1 0 3 3 -2 1 -2 -2 2 0 2 -1 -1 0 0 1 -3     | 3 | 3      | 4 | 0      |
| 126 | -3 3 2 0 -1 1 3 3 -1 1 -2 -2 1 0 1 -1 -1 0 0 0 -3      | 2 | 2      | 3 | 0      |
| 127 | -3 3 2 0 0 0 3 3 0 1 -2 -2 1 -2 2 -1 -1 0 0 0 -3       | 2 | 2      | 3 | 0      |
| 128 | -3 3 2 1 -1 1 3 3 0 1 -2 -2 0 -1 1 -1 -1 0 0 -1 -3     | 1 | 1      | 2 | 0      |
| 129 | -3 3 2 3 2 2 1 1 -2 1 -1 -1 -1 -2 0 0 0 0 -1 -4 0      | 1 | 1      | 2 | 0      |
| 130 | -3 3 2 6 1 6 5 4 -6 -1 0 0 -2 -1 -2 -3 -3 2 -2 -7 0    | 1 | 1      | 3 | 0      |
| 131 | -3 3 3 0 -1 -1 2 3 -2 1 -1 -1 2 0 2 -2 -2 0 -2 1 -1    | 3 | 3      | 4 | 0      |
| 132 | -3 3 3 0 -1 1 3 3 0 2 -2 -2 1 0 1 -2 -1 -1 0 0 -3      | 2 | 2      | 3 | 0      |
| 133 | -3 3 3 1 -1 2 3 3 0 2 -2 -2 0 0 0 -2 -1 -1 0 -1 -3     | 1 | 1      | 2 | 0      |
| 134 | -3 3 3 1 1 2 2 3 -2 1 -1 -1 1 -1 0 -2 -2 0 -2 -2 -1    | 1 | 1      | 2 | 0      |
| 135 | -3 3 3 2 -2 3 3 3 0 2 -2 -2 -1 1 -1 -2 -1 -1 0 -1 -3   | 1 | 1      | 2 | 0      |
| 136 | -3 3 3 3 0 3 0 0 0 2 -2 -2 -2 -1 -1 1 2 -1 0 -3 0      | 2 | 2      | 3 | 0      |
| 137 | -3 3 4 -1 -1 0 1 3 -2 1 -2 -2 2 0 2 -1 -1 0 -2 1 -1    | 3 | 3      | 4 | 0      |
| 138 | -3 3 4 1 -1 2 2 3 -1 2 -2 -2 0 0 0 -2 -1 -1 -1 -1 -2   | 1 | 1      | 2 | 0      |
| 139 | -3 3 4 2 2 2 1 1 0 0 -1 -1 1 -2 1 -1 1 -3 -3 -4 -1     | 0 | 0.0304 | 2 | 0.1301 |
| 140 | -3 3 4 2 2 2 1 3 -2 0 -1 -1 1 -2 1 -1 -1 -1 -3 -4 -1   | 0 | 0.2518 | 2 | 0.1976 |
| 141 | -3 3 4 3 -3 4 4 4 0 2 -2 -2 -2 2 -2 -2 -2 -1 -1 -1 -4  | 1 | 1      | 2 | 0      |
| 142 | -3 3 4 4 -1 4 3 3 -2 1 -2 -2 -2 1 -2 -1 -1 0 -2 -3 -3  | 0 | 0      | 1 | 0      |

|     |                                                       |   |        |   |        |
|-----|-------------------------------------------------------|---|--------|---|--------|
| 143 | -3 3 5 2 0 2 1 3 -2 1 -2 -2 0 -1 0 -1 -1 -1 -2 -2 -1  | 0 | 0.2625 | 2 | 0.2072 |
| 144 | -3 4 1 3 2 1 0 0 0 1 -1 0 -2 -3 0 2 1 -1 -1 -3 0      | 1 | 1.133  | 3 | 0.1829 |
| 145 | -3 4 1 3 2 1 1 1 -1 1 -1 0 -2 -3 0 1 0 0 -1 -3 0      | 1 | 1.1313 | 3 | 0.1974 |
| 146 | -3 4 1 4 1 4 4 4 -4 1 -1 0 -2 -2 -3 -2 -3 3 -1 -4 0   | 1 | 1.4021 | 3 | 0.1987 |
| 147 | -3 4 2 4 0 4 4 4 -4 1 -1 0 -2 -1 -3 -2 -3 3 -2 -4 0   | 1 | 1.4667 | 3 | 0.2054 |
| 148 | -3 4 3 2 -1 3 0 0 0 2 -2 -2 -2 -1 -1 1 2 -1 -1 -2 0   | 2 | 2      | 3 | 0      |
| 149 | -3 4 3 2 -1 3 1 1 0 2 -2 -2 -2 -1 -1 0 1 -1 -1 -2 -1  | 1 | 1      | 2 | 0      |
| 150 | -3 4 4 3 3 3 2 2 -1 -1 -1 -1 1 -3 1 -1 1 -3 -4 -6 -2  | 0 | 0      | 2 | 0      |
| 151 | -3 4 4 3 3 3 2 4 -3 -1 -1 -1 1 -3 1 -1 -1 -1 -4 -6 -2 | 0 | 0      | 2 | 0      |
| 152 | -3 5 5 3 3 3 1 1 0 -1 -2 -1 1 -3 1 -1 2 -4 -5 -6 -1   | 0 | 0      | 2 | 0      |
| 153 | -3 5 5 3 3 3 1 4 -3 -1 -2 -1 1 -3 1 -1 -1 -1 -5 -6 -1 | 0 | 0      | 2 | 0      |
| 154 | -2 -2 0 0 0 0 0 0 0 0 1 1 2 -1 1 0 1 -1 2 0 0         | 4 | 4      | 5 | 0      |
| 155 | -2 -2 0 2 0 2 0 0 0 0 1 1 0 -1 -1 0 1 -1 2 -2 0       | 2 | 2      | 3 | 0      |
| 156 | -2 -2 0 4 -1 4 0 0 0 -1 2 2 -1 -1 -2 1 1 -2 2 -4 0    | 2 | 2.0766 | 4 | 0.1627 |
| 157 | -2 -2 0 4 -1 4 1 1 -1 -1 2 2 -1 -1 -2 0 0 -1 2 -4 0   | 2 | 2.173  | 4 | 0.2053 |
| 158 | -2 -2 2 6 0 6 2 0 -2 -2 1 1 -2 -1 -3 0 1 -1 0 -6 0    | 1 | 1      | 3 | 0      |
| 159 | -2 -1 -2 1 -1 1 3 2 -2 0 2 2 0 -1 0 -1 -1 0 3 -1 -2   | 3 | 3      | 4 | 0      |
| 160 | -2 -1 -2 2 -1 2 3 1 -2 0 2 2 -1 -1 0 -1 -1 0 3 -2 -1  | 3 | 3      | 4 | 0      |
| 161 | -2 -1 1 2 1 3 1 0 1 0 1 1 0 -2 -2 0 2 -2 1 -3 -1      | 2 | 2      | 3 | 0      |
| 162 | -2 -1 1 4 -1 3 2 1 -1 0 1 1 -2 0 -2 0 0 0 1 -3 -1     | 2 | 2      | 3 | 0      |
| 163 | -2 -1 1 4 0 4 0 0 0 -1 1 1 -1 -1 -2 1 1 -2 1 -4 0     | 1 | 1.0162 | 3 | 0.1623 |
| 164 | -2 -1 1 4 0 4 1 1 -1 -1 1 1 -1 -1 -2 0 0 -1 1 -4 0    | 1 | 1.1763 | 3 | 0.2174 |
| 165 | -2 0 2 0 0 0 -1 0 -1 1 0 -1 1 0 1 0 0 0 0 0 1         | 2 | 2.1547 | 3 | 0.1959 |
| 166 | -2 0 2 0 0 0 4 0 4 -1 0 0 1 1 -2 -1 -1 -2 0 0 -4      | 0 | 0      | 2 | 0      |
| 167 | -2 0 2 1 0 1 -1 0 -1 1 0 -1 0 0 0 0 0 0 0 -1 1        | 1 | 1.4142 | 2 | 0.25   |
| 168 | -2 0 2 1 1 -1 4 0 4 -1 0 0 0 0 -1 -1 -1 -2 0 0 -4     | 0 | 0.0981 | 2 | 0.1667 |
| 169 | -2 0 2 1 2 -1 1 0 -1 1 1 0 -2 -1 -1 1 -1 1 0 -1 0     | 2 | 2      | 3 | 0      |
| 170 | -2 0 2 2 -2 4 2 0 -2 1 1 0 -1 1 -2 -1 -1 0 0 -2 0     | 2 | 2.0981 | 3 | 0.25   |
| 171 | -2 0 2 2 1 2 -1 1 -1 1 0 -1 -1 -1 -1 0 0 0 0 -2 0     | 0 | 0.4158 | 1 | 0.2358 |
| 172 | -2 1 -1 0 -1 -1 4 4 -1 0 1 1 2 -1 1 -2 -2 0 1 1 -4    | 3 | 3      | 4 | 0      |
| 173 | -2 1 -1 0 0 0 4 3 -1 0 1 1 2 -1 1 -2 -2 0 1 0 -3      | 3 | 3      | 4 | 0      |
| 174 | -2 1 -1 1 -2 -1 4 4 -1 0 1 1 1 0 1 -2 -2 0 1 1 -4     | 3 | 3      | 4 | 0      |
| 175 | -2 1 -1 1 -1 0 4 3 -1 0 1 1 1 0 1 -2 -2 0 1 0 -3      | 3 | 3      | 4 | 0      |
| 176 | -2 1 -1 1 0 1 4 3 -1 0 1 1 1 -1 0 -2 -2 0 1 -1 -3     | 2 | 2      | 3 | 0      |
| 177 | -2 1 -1 1 1 1 2 2 -1 0 1 1 0 -2 0 0 0 0 1 -2 -2       | 2 | 2      | 3 | 0      |
| 178 | -2 1 -1 2 0 2 4 3 -2 0 1 1 0 -1 -1 -2 -2 1 1 -2 -2    | 2 | 2      | 3 | 0      |
| 179 | -2 1 -1 2 1 1 2 1 -1 0 1 1 -1 -2 0 0 0 0 1 -2 -1      | 2 | 2      | 3 | 0      |
| 180 | -2 1 -1 3 1 3 4 3 -3 0 1 1 -1 -2 -2 -2 -2 2 1 -3 -1   | 2 | 2      | 3 | 0      |
| 181 | -2 1 1 0 0 0 0 0 0 1 -1 1 -1 -1 -2 1 1 -1 0 0 0       | 1 | 1      | 2 | 0      |
| 182 | -2 1 1 1 0 1 0 0 0 1 -1 1 -1 -1 -2 1 1 -1 0 -1 0      | 1 | 1      | 2 | 0      |
| 183 | -2 1 1 1 1 2 0 0 0 1 -1 1 -1 -1 -2 1 1 -1 0 -2 0      | 1 | 1      | 2 | 0      |
| 184 | -2 1 1 2 2 3 0 0 0 1 -1 1 -1 -1 -2 1 1 -1 0 -4 0      | 1 | 1      | 2 | 0      |
| 185 | -2 1 1 3 1 3 2 2 -3 0 0 0 -1 -1 -1 -1 -1 1 0 -4 0     | 1 | 1      | 2 | 0      |
| 186 | -2 1 2 -1 -1 -1 1 2 -1 0 0 0 2 0 2 -1 -1 -1 -1 2 -1   | 3 | 3      | 4 | 0      |
| 187 | -2 1 2 -1 -1 0 1 1 -1 0 0 0 2 0 2 -1 -1 -1 -1 1 0     | 3 | 3      | 4 | 0      |
| 188 | -2 1 2 0 0 0 0 1 -1 1 0 -1 1 0 1 -1 -1 0 -1 0 0       | 1 | 1.1739 | 2 | 0.2319 |
| 189 | -2 1 2 0 0 0 1 1 0 0 -1 -1 2 -1 1 0 0 -1 0 0 -1       | 2 | 2      | 3 | 0      |
| 190 | -2 1 2 1 -1 0 1 1 0 0 -1 -1 1 0 1 0 0 -1 0 0 -1       | 2 | 2      | 3 | 0      |
| 191 | -2 1 2 1 0 1 0 1 -1 1 0 -1 0 0 0 -1 -1 0 -1 -1 0      | 0 | 0.3808 | 1 | 0.2312 |
| 192 | -2 1 2 1 1 0 2 0 2 0 -1 -1 0 0 -1 0 -1 -1 0 -1 -2     | 0 | 0.0521 | 1 | 0.111  |

|            |                                                             |          |               |          |               |
|------------|-------------------------------------------------------------|----------|---------------|----------|---------------|
| 193        | -2 1 2 1 1 1 1 1 0 0 0 0 1 -1 1 -1 0 -2 -1 -2 -1            | 0        | 0.3632        | 2        | 0.2355        |
| 194        | -2 1 2 1 2 2 1 3 -2 0 0 0 1 -2 0 -1 -1 0 -1 -3 -1           | 1        | 1             | 2        | 0             |
| <b>195</b> | <b>-2 1 2 2 -2 2 2 2 1 1 -1 -1 -1 1 -1 -1 -1 -1 0 -1 -2</b> | <b>0</b> | <b>0.5</b>    | <b>1</b> | <b>0.25</b>   |
| <b>196</b> | <b>-2 1 2 2 -1 2 1 1 0 1 -1 -1 -1 0 -1 0 0 0 0 -2 -1</b>    | <b>0</b> | <b>0.4158</b> | <b>1</b> | <b>0.2358</b> |
| 197        | -2 1 2 2 -1 2 2 2 0 1 -1 -1 -1 1 -1 -1 -1 -1 0 -1 -2        | 0        | 0.2249        | 1        | 0.2161        |
| 198        | -2 1 2 2 -1 2 2 2 1 0 -1 -1 0 -1 -1 0 0 -1 0 -2 -3          | 0        | 0.0295        | 1        | 0.094         |
| 199        | -2 1 2 2 0 2 1 0 1 1 -1 -1 -1 -1 -1 0 1 -1 0 -2 -1          | 0        | 0.3371        | 1        | 0.2098        |
| 200        | -2 1 2 2 1 2 0 0 0 1 -1 -1 -1 -1 -1 0 1 -1 0 -2 0           | 0        | 0.3094        | 1        | 0.2253        |
| 201        | -2 1 2 2 1 2 1 2 -2 0 0 0 0 -1 0 -1 -1 0 -1 -3 0            | 1        | 1             | 2        | 0             |
| 202        | -2 1 2 2 1 3 0 0 0 1 -1 0 -1 -1 -2 1 1 -1 0 -3 0            | 1        | 1             | 2        | 0             |
| 203        | -2 1 2 2 1 3 1 1 -1 0 -1 -1 0 -1 -1 0 0 -1 0 -3 -1          | 0        | 0.0386        | 1        | 0.1142        |
| 204        | -2 1 3 0 -1 -1 0 0 0 0 -1 -1 2 0 2 0 1 -2 -1 1 0            | 3        | 3             | 4        | 0             |
| 205        | -2 1 3 0 -1 -1 0 1 -1 0 -1 -1 2 0 2 0 0 -1 -1 1 0           | 3        | 3             | 4        | 0             |
| 206        | -2 1 3 0 0 0 -1 1 -1 0 -1 -1 2 0 1 0 0 -1 -1 0 0            | 2        | 2             | 3        | 0             |
| 207        | -2 1 3 0 0 0 0 -1 1 1 0 -1 -1 0 -2 1 0 0 -1 0 0             | 1        | 1             | 2        | 0             |
| 208        | -2 1 3 0 0 0 0 0 0 0 -1 -1 2 -1 1 0 1 -2 -1 0 0             | 2        | 2             | 3        | 0             |
| 209        | -2 1 3 0 0 0 0 0 0 1 0 -1 -1 0 -2 1 -1 1 -1 0 0             | 1        | 1             | 2        | 0             |
| 210        | -2 1 3 0 0 0 0 1 -1 0 -1 -1 2 -1 1 0 0 -1 -1 0 0            | 2        | 2             | 3        | 0             |
| 211        | -2 1 3 0 0 0 2 -1 1 0 -1 -1 0 1 -2 0 0 0 -1 0 -1            | 1        | 1             | 2        | 0             |
| 212        | -2 1 3 0 0 0 2 0 2 0 -1 -1 0 1 -2 0 -1 -1 -1 0 -2           | 0        | 0             | 1        | 0             |
| 213        | -2 1 3 0 1 -1 0 0 0 1 0 -1 -1 -1 -1 1 -1 1 -1 0 0           | 1        | 1             | 2        | 0             |
| 214        | -2 1 3 0 1 -1 2 -1 1 0 -1 -1 0 0 -1 0 0 0 -1 0 -1           | 1        | 1             | 2        | 0             |
| 215        | -2 1 3 1 0 1 -1 1 -1 0 -1 -1 1 0 0 0 0 -1 -1 -1 0           | 1        | 1             | 2        | 0             |
| 216        | -2 1 3 1 2 -1 4 -2 2 -1 -1 -1 0 0 -1 -1 0 -1 -1 -1 -2       | 0        | 0.1449        | 2        | 0.2126        |
| 217        | -2 1 3 2 1 -1 4 -2 3 0 -1 -1 0 0 0 -2 1 -2 -1 -1 -2         | 1        | 1             | 2        | 0             |
| 218        | -2 1 3 2 1 2 -2 3 -3 2 0 -1 -2 -2 -1 0 -1 1 -1 -2 0         | 1        | 1.0808        | 2        | 0.1372        |
| 219        | -2 1 3 2 1 3 0 0 0 0 -1 -1 0 -1 -1 0 1 -2 -1 -3 0           | 0        | 0             | 1        | 0             |
| 220        | -2 1 3 4 -1 4 2 2 -1 0 -1 -1 -2 1 -2 0 -1 -1 -1 -3 -2       | 0        | 0             | 1        | 0             |
| 221        | -2 2 -1 2 0 2 6 5 -2 -2 1 1 0 -3 -1 -2 -2 1 0 -2 -4         | 1        | 1             | 3        | 0             |
| 222        | -2 2 0 0 0 0 0 0 0 1 -1 1 -1 -1 -1 1 1 -1 0 0 0             | 1        | 1             | 2        | 0             |
| 223        | -2 2 0 2 1 3 2 3 -3 1 0 1 -1 -1 -2 -1 -2 2 0 -3 0           | 2        | 2.1038        | 3        | 0.2203        |
| 224        | -2 2 0 2 2 2 0 0 0 1 -1 1 -1 -1 -1 1 1 -1 0 -4 0            | 1        | 1             | 2        | 0             |
| 225        | -2 2 1 0 0 0 2 2 0 1 -1 -1 1 -1 1 -1 -1 0 0 0 -2            | 1        | 1             | 2        | 0             |
| 226        | -2 2 1 2 1 1 1 1 -1 1 -1 -1 -1 -1 0 0 0 0 0 -2 -1           | 0        | 0.4347        | 1        | 0.2432        |
| 227        | -2 2 2 -1 -1 0 1 1 0 1 -1 -1 1 0 1 -1 0 -1 -1 1 -1          | 1        | 1.4142        | 2        | 0.25          |
| 228        | -2 2 2 0 0 0 1 2 -1 1 -1 -1 1 0 1 -1 -1 0 -1 0 -1           | 1        | 1.3371        | 2        | 0.25          |
| 229        | -2 2 2 1 -1 2 1 1 0 1 -1 -1 -1 0 -1 0 0 0 -1 -1 -1          | 0        | 0.4365        | 1        | 0.25          |
| 230        | -2 2 2 2 -2 2 2 2 0 0 -1 0 -2 1 -2 0 -1 0 -2 0 -2           | 0        | 0.1419        | 1        | 0.158         |
| 231        | -2 2 2 2 -2 2 2 2 0 1 -1 -1 -1 1 -1 -1 -1 -1 0 0 -2         | 1        | 1             | 2        | 0             |
| <b>232</b> | <b>-2 2 2 2 -2 2 2 2 0 1 -1 -1 -1 1 -1 -1 -1 0 -1 -1 -2</b> | <b>0</b> | <b>0.5</b>    | <b>1</b> | <b>0.25</b>   |
| 233        | -2 2 2 2 2 2 2 2 -1 -1 0 0 1 -2 1 -1 0 -2 -2 -4 -2          | 0        | 0             | 2        | 0             |
| 234        | -2 2 2 2 2 2 2 3 -2 -1 0 0 1 -2 1 -1 -1 -1 -2 -4 -2         | 0        | 0.0353        | 2        | 0.1542        |
| 235        | -2 2 2 4 1 4 3 3 -4 -1 0 0 -1 -1 -1 -2 -2 1 -2 -5 0         | 0        | 0.3331        | 2        | 0.1861        |
| 236        | -2 2 2 6 1 6 5 4 -6 -2 1 0 -2 -1 -2 -3 -3 2 -2 -7 0         | 1        | 1             | 3        | 0             |
| 237        | -2 2 3 -1 -1 -1 0 0 0 0 -1 -1 2 0 2 0 1 -2 -2 2 0           | 3        | 3             | 4        | 0             |
| 238        | -2 2 3 -1 -1 -1 0 1 -1 0 -1 -1 2 0 2 0 0 -1 -2 2 0          | 3        | 3             | 4        | 0             |
| 239        | -2 2 3 -1 -1 -1 1 2 -2 0 -1 -1 2 0 2 -1 -1 0 -2 2 0         | 3        | 3             | 4        | 0             |
| 240        | -2 2 3 0 0 0 1 1 0 1 -1 -1 1 -1 1 -1 0 -2 -1 0 -1           | 1        | 1             | 2        | 0             |
| 241        | -2 2 3 1 -1 1 1 1 0 1 -1 -1 0 0 0 -1 0 -2 -1 0 -1           | 1        | 1             | 2        | 0             |
| 242        | -2 2 3 1 -1 1 1 2 -1 1 -1 -1 0 0 0 -1 -1 -1 -1 0 -1         | 1        | 1             | 2        | 0             |

|     |                                                       |   |        |   |        |
|-----|-------------------------------------------------------|---|--------|---|--------|
| 243 | -2 2 3 1 0 -1 3 -1 3 1 -1 -1 1 1 0 -2 0 -2 -1 0 -2    | 2 | 2      | 3 | 0      |
| 244 | -2 2 3 2 1 2 0 0 0 0 -1 -1 0 -1 0 0 1 -2 -2 -3 0      | 0 | 0      | 1 | 0      |
| 245 | -2 2 3 3 -2 3 1 1 0 0 -2 -2 -1 1 -1 0 1 -1 -1 -2 -1   | 1 | 1      | 2 | 0      |
| 246 | -2 2 3 3 -1 3 1 1 -1 0 -2 -2 -1 1 -1 0 1 -1 -1 -2 -1  | 1 | 1      | 2 | 0      |
| 247 | -2 2 3 3 -1 3 1 1 0 1 -1 -1 -2 0 -2 1 0 -1 -1 -2 -1   | 1 | 1      | 2 | 0      |
| 248 | -2 2 3 4 -1 4 3 2 -2 0 -1 -1 -2 1 -2 -1 -1 0 -2 -3 -2 | 0 | 0      | 1 | 0      |
| 249 | -2 2 4 0 0 0 0 2 -2 1 -1 -2 1 -1 2 -1 -1 0 -2 0 0     | 2 | 2      | 3 | 0      |
| 250 | -2 2 4 2 0 2 0 2 -2 1 -1 -2 -1 -1 0 -1 -1 0 -2 -2 0   | 0 | 0      | 1 | 0      |
| 251 | -2 2 4 2 4 -2 4 -2 2 -1 -1 -1 -1 -1 -1 -1 -1 -2 -2 -2 | 0 | 0      | 2 | 0      |
| 252 | -2 3 1 0 0 0 4 3 -2 0 -1 -1 2 -1 1 -2 -2 1 -1 0 -2    | 2 | 2      | 3 | 0      |
| 253 | -2 3 1 1 -1 0 4 3 -2 0 -1 -1 1 0 1 -2 -2 1 -1 0 -2    | 2 | 2      | 3 | 0      |
| 254 | -2 3 2 0 -1 1 3 3 -2 0 -2 -2 1 0 1 -1 -1 1 -1 0 -2    | 2 | 2      | 3 | 0      |
| 255 | -2 3 2 0 0 0 3 3 -1 0 -2 -2 1 -2 2 -1 -1 1 -1 0 -2    | 2 | 2      | 3 | 0      |
| 256 | -2 3 2 0 0 0 3 3 -1 1 -1 -1 2 -1 1 -2 -2 0 -1 0 -2    | 2 | 2      | 3 | 0      |
| 257 | -2 3 3 0 -1 1 2 3 -1 1 -2 -2 1 0 1 -1 -1 0 -1 0 -2    | 2 | 2      | 3 | 0      |
| 258 | -2 3 3 0 0 0 2 3 -2 1 -1 -1 2 -1 1 -2 -2 0 -2 0 -1    | 2 | 2      | 3 | 0      |
| 259 | -2 3 3 0 0 0 2 3 -1 1 -2 -2 1 -1 2 -1 -1 0 -1 0 -2    | 2 | 2      | 3 | 0      |
| 260 | -2 3 4 2 0 2 1 1 0 1 -2 -2 -1 -1 0 -1 1 -2 -2 -2 -1   | 0 | 0      | 1 | 0      |
| 261 | -2 3 4 3 3 -3 4 1 3 -1 -1 -1 -2 -2 0 -1 -2 0 -3 0 -4  | 0 | 0.0274 | 2 | 0.1577 |
| 262 | -2 3 5 0 1 1 2 5 -3 0 -1 -1 2 -3 1 -2 -2 -1 -3 -1 -2  | 1 | 1      | 3 | 0      |
| 263 | -2 4 4 -2 -2 -2 1 3 -3 -1 -2 -1 3 0 3 -1 -1 0 -4 4 0  | 4 | 4.2275 | 6 | 0.1741 |
| 264 | -2 4 4 0 0 0 4 2 2 -1 -1 -1 1 1 -3 -1 -3 1 -4 0 -4    | 0 | 0      | 2 | 0      |
| 265 | -2 4 4 2 2 -2 4 2 2 -1 -1 -1 -1 -1 -1 -1 -3 1 -4 0 -4 | 0 | 0      | 2 | 0      |
| 266 | -2 4 4 2 2 2 0 0 0 -1 -2 -1 1 -2 1 0 2 -3 -4 -4 0     | 0 | 0      | 2 | 0      |
| 267 | -2 4 4 2 2 2 0 2 -2 -1 -2 -1 1 -2 1 0 0 -1 -4 -4 0    | 0 | 0.027  | 2 | 0.1235 |
| 268 | -2 4 4 2 2 2 2 2 0 -1 -1 -1 1 -3 1 -1 1 -3 -4 -4 -2   | 0 | 0      | 2 | 0      |
| 269 | -2 4 4 2 2 2 2 4 -2 -1 -1 -1 1 -3 1 -1 -1 -1 -4 -4 -2 | 0 | 0      | 2 | 0      |
| 270 | -2 4 4 4 -2 4 4 4 -2 1 -2 -2 -2 1 -2 -2 -2 1 -3 -3 -3 | 0 | 0      | 1 | 0      |
| 271 | -2 4 6 2 -2 2 2 4 -4 1 -1 -2 1 -1 0 -3 -3 0 -4 -2 0   | 1 | 1      | 3 | 0      |
| 272 | -2 4 6 2 0 2 -2 2 -2 1 -1 -2 -1 -3 0 1 1 -2 -4 -2 0   | 1 | 1      | 3 | 0      |
| 273 | -2 5 5 0 0 0 4 3 1 -1 -1 -2 1 1 -3 -1 -4 2 -5 0 -4    | 0 | 0      | 2 | 0      |
| 274 | -2 5 5 1 1 -1 4 3 1 -1 -1 -2 0 0 -2 -1 -4 2 -5 0 -4   | 0 | 0      | 2 | 0      |
| 275 | -2 5 5 5 0 5 5 5 -5 -1 -1 -2 -1 -1 -2 -4 -4 2 -5 -5 0 | 0 | 0.1545 | 2 | 0.1534 |
| 276 | -2 6 4 -2 -2 2 2 2 0 -1 -2 -3 1 -2 1 1 0 -1 -4 0 -2   | 1 | 1      | 3 | 0      |
| 277 | -1 -1 -1 0 0 0 1 1 -1 0 1 1 1 -1 0 0 0 0 2 0 -1       | 2 | 2.125  | 3 | 0.2098 |
| 278 | -1 -1 0 -1 1 -1 0 0 0 0 1 1 1 -1 1 0 0 -1 1 1 0       | 2 | 2.2071 | 3 | 0.25   |
| 279 | -1 -1 0 0 -1 1 1 2 -1 0 2 2 1 -1 0 -1 -1 -1 1 0 -1    | 3 | 3      | 4 | 0      |
| 280 | -1 -1 0 0 0 0 0 0 0 0 1 1 1 -1 1 0 0 -1 1 0 0         | 2 | 2      | 3 | 0      |
| 281 | -1 -1 0 0 0 0 0 1 -1 0 1 1 1 -1 0 0 0 0 1 0 0         | 2 | 2      | 3 | 0      |
| 282 | -1 -1 0 0 0 0 1 0 1 0 1 1 0 1 -1 0 -1 -1 1 0 -1       | 1 | 1      | 2 | 0      |
| 283 | -1 -1 0 0 0 0 1 1 -1 0 2 2 1 -2 2 -1 -1 -1 1 0 0      | 4 | 4      | 5 | 0      |
| 284 | -1 -1 0 0 0 0 1 1 0 -1 1 1 2 -1 1 0 0 -1 1 0 -1       | 3 | 3      | 4 | 0      |
| 285 | -1 -1 0 0 0 0 1 1 0 0 1 1 1 -1 0 -1 0 -1 1 0 -1       | 1 | 1      | 2 | 0      |
| 286 | -1 -1 0 0 0 0 1 2 -1 0 2 2 1 -2 1 -1 -1 -1 1 0 -1     | 3 | 3      | 4 | 0      |
| 287 | -1 -1 0 0 1 -1 1 -1 0 0 1 1 0 0 0 0 0 0 1 0 0         | 2 | 2.2071 | 3 | 0.25   |
| 288 | -1 -1 0 0 1 -1 1 0 1 0 1 1 0 0 0 0 -1 -1 1 0 -1       | 1 | 1.299  | 2 | 0.25   |
| 289 | -1 -1 0 0 1 1 1 2 -1 -1 1 1 2 -2 0 0 0 0 1 -1 -1      | 3 | 3      | 4 | 0      |
| 290 | -1 -1 0 0 1 1 2 2 0 -1 1 1 2 -2 0 -1 0 -1 1 -1 -2     | 2 | 2      | 3 | 0      |
| 291 | -1 -1 0 0 2 2 5 5 0 -2 2 2 3 -4 0 -3 -1 -2 1 -2 -5    | 2 | 2      | 4 | 0      |
| 292 | -1 -1 0 1 -1 0 1 1 0 -1 1 1 1 0 1 0 0 -1 1 0 -1       | 3 | 3      | 4 | 0      |

|     |                                                      |   |        |   |        |
|-----|------------------------------------------------------|---|--------|---|--------|
| 293 | -1 -1 0 1 -1 1 1 1 -1 0 2 2 0 -1 1 -1 -1 -1 -1 0     | 3 | 3      | 4 | 0      |
| 294 | -1 -1 0 1 -1 1 1 2 -2 0 2 2 0 -1 0 -1 -1 0 1 -1 0    | 3 | 3      | 4 | 0      |
| 295 | -1 -1 0 1 0 1 2 2 0 -1 1 1 1 -2 -1 -1 0 -1 1 -1 -2   | 1 | 1      | 2 | 0      |
| 296 | -1 -1 0 1 1 0 1 -1 0 0 1 1 -1 0 -1 0 0 0 1 -1 0      | 1 | 1.1547 | 2 | 0.1959 |
| 297 | -1 -1 0 1 1 0 2 0 2 -1 1 1 0 0 -1 0 -1 -1 1 -1 -2    | 1 | 1      | 2 | 0      |
| 298 | -1 -1 0 1 1 2 1 2 -1 -1 1 1 1 -2 -1 0 0 0 1 -2 -1    | 2 | 2      | 3 | 0      |
| 299 | -1 -1 0 1 2 -1 3 -2 1 -1 1 1 0 0 0 -1 0 -1 1 -1 -1   | 2 | 2      | 3 | 0      |
| 300 | -1 -1 0 2 -1 1 1 1 -1 0 1 1 -1 0 -1 0 0 0 1 -1 -1    | 1 | 1.3913 | 2 | 0.2371 |
| 301 | -1 -1 0 2 1 3 1 0 1 -1 1 2 0 -2 -2 0 2 -2 1 -3 -1    | 2 | 2      | 3 | 0      |
| 302 | -1 -1 0 3 -1 3 0 0 0 -1 1 1 -1 0 -1 1 0 -2 1 -3 0    | 1 | 1      | 2 | 0      |
| 303 | -1 -1 0 4 -1 3 2 1 -1 -1 1 2 -2 0 -2 0 0 0 1 -3 -1   | 2 | 2      | 3 | 0      |
| 304 | -1 -1 0 4 0 4 0 0 0 -2 1 2 -1 -1 -2 1 1 -2 1 -4 0    | 1 | 1      | 3 | 0      |
| 305 | -1 -1 0 4 0 4 1 1 -1 -2 1 2 -1 -1 -2 0 0 -1 1 -4 0   | 1 | 1.0466 | 3 | 0.1797 |
| 306 | -1 -1 0 5 5 0 5 -5 2 -2 2 2 -3 -1 -2 -2 1 -2 1 -5 0  | 2 | 2.0009 | 4 | 0.0451 |
| 307 | -1 -1 1 0 2 -2 3 0 3 -1 1 2 1 0 0 -1 -2 -3 0 0 -3    | 1 | 1.0334 | 3 | 0.2183 |
| 308 | -1 -1 1 1 1 -1 3 0 3 -1 1 1 0 0 0 -1 -1 -2 0 0 -3    | 1 | 1      | 2 | 0      |
| 309 | -1 -1 1 1 1 0 3 -1 2 -1 1 1 0 1 -1 -1 -1 -2 0 -1 -2  | 1 | 1      | 2 | 0      |
| 310 | -1 -1 1 1 2 -1 2 0 2 -1 1 1 0 0 0 0 -2 -2 0 -1 -2    | 0 | 0.4142 | 2 | 0.25   |
| 311 | -1 -1 1 1 2 -1 3 -1 2 -1 1 1 0 0 0 -1 -1 -2 0 -1 -2  | 1 | 1      | 2 | 0      |
| 312 | -1 -1 1 2 0 2 1 1 0 -1 1 1 0 -2 -2 0 1 -1 0 -2 -1    | 0 | 0.1514 | 2 | 0.1891 |
| 313 | -1 -1 1 2 0 2 3 3 0 -2 1 1 1 -3 -2 -1 0 -1 0 -2 -3   | 0 | 0      | 2 | 0      |
| 314 | -1 -1 1 2 0 2 5 5 1 -3 1 1 2 -4 -2 -2 -1 -2 0 -2 -5  | 0 | 0      | 2 | 0      |
| 315 | -1 -1 1 2 1 3 1 1 0 -1 1 1 0 -2 -2 0 1 -1 0 -3 -1    | 1 | 1      | 2 | 0      |
| 316 | -1 -1 1 2 1 3 3 3 0 -2 1 1 1 -3 -2 -1 0 -1 0 -3 -3   | 0 | 0.0173 | 2 | 0.2023 |
| 317 | -1 -1 1 2 1 3 5 5 1 -3 1 1 2 -4 -2 -2 -1 -2 0 -3 -5  | 0 | 0      | 2 | 0      |
| 318 | -1 -1 1 2 2 0 4 -1 3 -2 1 1 0 0 -1 -1 -1 -2 0 -2 -3  | 0 | 0.1794 | 2 | 0.2091 |
| 319 | -1 -1 1 2 2 4 3 3 -1 -2 1 1 1 -3 -2 -1 0 -1 0 -4 -3  | 0 | 0.0609 | 2 | 0.2326 |
| 320 | -1 -1 1 2 3 5 5 5 -1 -3 1 1 2 -4 -2 -2 -1 -2 0 -5 -5 | 0 | 0      | 2 | 0      |
| 321 | -1 -1 1 3 0 3 4 4 1 -3 1 1 1 -3 -2 -1 -1 -2 0 -3 -4  | 0 | 0      | 2 | 0      |
| 322 | -1 -1 1 3 1 4 2 2 -1 -2 1 1 0 -2 -2 0 0 -1 0 -4 -2   | 0 | 0.0838 | 2 | 0.2363 |
| 323 | -1 -1 1 4 0 4 1 -1 -1 -1 1 1 -2 -1 -2 1 1 -1 0 -4 0  | 1 | 1      | 2 | 0      |
| 324 | -1 -1 1 4 0 4 2 0 -2 -1 1 1 -2 -1 -2 0 0 0 0 -4 0    | 0 | 0.5298 | 2 | 0.218  |
| 325 | -1 -1 1 4 0 4 2 1 -1 -2 1 1 -1 -1 -2 0 0 -1 0 -4 -1  | 0 | 0.1763 | 2 | 0.2174 |
| 326 | -1 -1 1 4 0 4 3 3 0 -3 1 1 0 -2 -2 0 -1 -2 0 -4 -3   | 0 | 0      | 2 | 0      |
| 327 | -1 -1 1 4 1 5 3 3 -1 -3 1 1 0 -2 -2 0 -1 -2 0 -5 -3  | 0 | 0      | 2 | 0      |
| 328 | -1 -1 1 5 0 5 0 0 0 -2 1 1 -2 -1 -2 2 0 -3 0 -5 0    | 0 | 0      | 2 | 0      |
| 329 | -1 -1 1 5 0 5 2 0 -2 -2 1 1 -2 -1 -2 0 0 -1 0 -5 0   | 0 | 0.0551 | 2 | 0.1467 |
| 330 | -1 -1 1 5 0 5 2 2 0 -3 1 1 -1 -1 -2 1 -1 -3 0 -5 -2  | 0 | 0      | 2 | 0      |
| 331 | -1 -1 1 5 0 5 3 2 -1 -3 1 1 -1 -1 -2 0 -1 -2 0 -5 -2 | 0 | 0      | 2 | 0      |
| 332 | -1 -1 1 6 0 6 1 1 0 -3 1 1 -2 -1 -2 2 -1 -4 0 -6 -1  | 0 | 0      | 2 | 0      |
| 333 | -1 -1 1 6 0 6 3 1 -2 -3 1 1 -2 -1 -2 0 -1 -2 0 -6 -1 | 0 | 0      | 2 | 0      |
| 334 | -1 0 -1 0 0 0 2 1 -1 0 1 1 1 -1 1 -1 -1 0 1 0 -1     | 2 | 2      | 3 | 0      |
| 335 | -1 0 -1 1 -1 0 4 3 -1 -1 2 1 1 0 1 -2 -2 0 1 0 -3    | 3 | 3      | 4 | 0      |
| 336 | -1 0 -1 1 -1 2 1 1 -2 0 2 2 -1 -1 -1 0 0 0 1 -1 0    | 3 | 3      | 4 | 0      |
| 337 | -1 0 -1 3 -1 3 3 3 -4 0 2 2 -1 -1 -2 -2 -2 2 1 -3 0  | 3 | 3      | 4 | 0      |
| 338 | -1 0 0 0 0 0 0 0 0 0 0 0 0 0 0 0 0 0 0 0 0           | 0 | 0      | 0 | 0      |
| 339 | -1 0 1 -1 -1 -1 2 2 -1 -1 1 0 2 0 2 -1 -1 -1 0 2 -2  | 3 | 3      | 4 | 0      |
| 340 | -1 0 1 -1 0 -1 0 0 0 0 0 0 0 0 0 0 1 0 0 0 1 0       | 1 | 1.2071 | 2 | 0.25   |
| 341 | -1 0 1 0 -1 1 1 1 -1 0 1 1 1 0 1 -1 -1 -1 0 0 0      | 3 | 3      | 4 | 0      |
| 342 | -1 0 1 0 0 0 0 0 0 0 0 0 0 -1 0 -1 1 0 0 0 0 0       | 0 | 0      | 1 | 0      |

|            |                                                          |          |               |          |             |
|------------|----------------------------------------------------------|----------|---------------|----------|-------------|
| 343        | -1 0 1 0 0 0 0 1 -1 0 0 0 1 -1 0 0 0 0 0 0 0             | 1        | 1             | 2        | 0           |
| 344        | -1 0 1 0 0 0 1 0 1 0 0 0 0 1 -1 0 -1 -1 0 0 -1           | 0        | 0             | 1        | 0           |
| 345        | -1 0 1 0 0 0 1 1 -1 0 1 1 1 -1 2 -1 -1 -1 0 0 0          | 3        | 3             | 4        | 0           |
| 346        | -1 0 1 0 0 0 1 1 0 0 1 1 1 -1 1 -1 0 -2 0 0 -1           | 1        | 1             | 3        | 0           |
| 347        | -1 0 1 0 0 0 1 2 -1 0 1 1 1 -1 1 -1 -1 -1 0 0 -1         | 2        | 2             | 3        | 0           |
| 348        | -1 0 1 0 1 -1 1 -1 0 0 0 0 0 0 0 0 0 0 0 0 0             | 1        | 1.299         | 2        | 0.25        |
| <b>349</b> | <b>-1 0 1 0 1 -1 1 1 2 0 0 0 0 0 0 0 -1 -1 0 0 -2</b>    | <b>0</b> | <b>0.4142</b> | <b>1</b> | <b>0.25</b> |
| 350        | -1 0 1 0 1 1 1 3 -2 0 1 1 1 -2 0 -1 -1 0 0 -1 -1         | 2        | 2             | 3        | 0           |
| 351        | -1 0 1 1 -1 1 1 2 -1 0 1 1 0 0 0 -1 -1 -1 0 0 -1         | 2        | 2             | 3        | 0           |
| 352        | -1 0 1 1 -1 2 1 1 -1 0 1 1 0 0 0 -1 -1 -1 0 -1 0         | 2        | 2             | 3        | 0           |
| 353        | -1 0 1 1 0 1 1 1 -1 0 1 1 0 -1 1 -1 -1 -1 0 -1 0         | 2        | 2             | 3        | 0           |
| 354        | -1 0 1 1 0 1 2 2 0 -1 0 0 1 -2 -1 -1 0 -1 0 -1 -2        | 0        | 0             | 1        | 0           |
| 355        | -1 0 1 1 1 0 2 0 2 -1 0 0 0 0 -1 0 -1 -1 0 -1 -2         | 0        | 0             | 1        | 0           |
| 356        | -1 0 1 1 1 2 0 0 0 0 0 0 0 -1 -1 0 1 -1 0 -2 0           | 0        | 0.1784        | 1        | 0.2185      |
| 357        | -1 0 1 1 1 2 1 3 -3 0 1 1 0 -2 -1 -1 -1 1 0 -2 0         | 2        | 2             | 3        | 0           |
| 358        | -1 0 1 1 1 2 2 2 0 -1 0 0 1 -2 -1 -1 0 -1 0 -2 -2        | 0        | 0             | 1        | 0           |
| 359        | -1 0 1 1 2 3 2 2 -1 -1 0 0 1 -2 -1 -1 0 -1 0 -3 -2       | 0        | 0             | 1        | 0           |
| 360        | -1 0 1 2 1 1 2 1 -1 -1 1 0 0 -1 1 -1 -1 -1 0 -2 -1       | 1        | 1             | 2        | 0           |
| 361        | -1 0 1 3 -3 4 3 2 -1 0 1 1 -2 2 -2 -1 -2 -1 0 -1 -2      | 2        | 2             | 3        | 0           |
| 362        | -1 0 1 3 -1 3 2 1 -1 -1 1 0 -1 1 -1 -1 -1 -1 0 -2 -1     | 1        | 1             | 2        | 0           |
| 363        | -1 0 1 3 -1 3 2 1 -1 0 1 1 -2 0 -2 0 0 0 0 -2 -1         | 2        | 2             | 3        | 0           |
| 364        | -1 0 1 3 0 3 3 0 -3 0 1 0 -2 -1 -1 -1 -1 1 0 -3 0        | 1        | 1             | 2        | 0           |
| 365        | -1 0 1 7 2 5 5 2 -5 -3 2 0 -3 -2 -1 -2 -2 1 0 -7 0       | 1        | 1             | 3        | 0           |
| 366        | -1 1 -1 -3 3 1 -1 -2 -1 2 0 2 2 -1 -2 -1 0 1 1 0 2       | 5        | 5             | 6        | 0           |
| 367        | -1 1 -1 -3 3 1 0 -1 -1 2 0 2 2 -1 -2 -2 -1 1 1 0 1       | 4        | 4             | 5        | 0           |
| 368        | -1 1 -1 -2 2 1 -2 -1 1 2 0 2 1 -1 -2 0 0 0 1 0 1         | 4        | 4             | 5        | 0           |
| 369        | -1 1 -1 -2 2 1 -1 -1 0 2 0 2 1 -1 -2 -1 0 1 1 0 1        | 4        | 4             | 5        | 0           |
| 370        | -1 1 -1 -2 2 1 0 0 0 2 0 2 1 -1 -2 -2 -1 1 1 0 0         | 3        | 3             | 4        | 0           |
| 371        | -1 1 -1 -1 2 1 -1 -1 1 2 0 2 0 -1 -2 -1 0 1 1 -1 0       | 3        | 3             | 4        | 0           |
| 372        | -1 1 -1 -1 2 1 0 0 0 2 0 2 0 -1 -2 -2 -1 2 1 -1 0        | 3        | 3             | 4        | 0           |
| 373        | -1 1 -1 0 0 0 -3 -1 2 2 0 2 -1 2 -1 1 -1 -2 1 0 1        | 4        | 4             | 5        | 0           |
| 374        | -1 1 -1 1 0 1 4 4 -1 -2 1 1 1 -3 -1 -1 -1 0 0 -1 -4      | 0        | 0             | 2        | 0           |
| 375        | -1 1 -1 1 1 2 4 4 -1 -2 1 1 1 -3 -1 -1 -1 0 0 -2 -4      | 0        | 0.0942        | 2        | 0.1859      |
| 376        | -1 1 -1 1 2 3 4 4 -2 -2 1 1 1 -3 -1 -1 -1 0 0 -3 -4      | 0        | 0.2038        | 2        | 0.1945      |
| 377        | -1 1 -1 2 0 2 4 3 -1 -2 1 1 0 -2 -1 -1 -1 0 0 -2 -3      | 0        | 0.1794        | 2        | 0.2091      |
| 378        | -1 1 -1 2 0 2 6 5 -2 -3 2 1 0 -3 -1 -2 -2 1 0 -2 -4      | 1        | 1             | 3        | 0           |
| 379        | -1 1 0 0 0 0 3 3 -1 0 1 1 2 -1 1 -2 -2 0 0 0 -2          | 3        | 3             | 4        | 0           |
| <b>380</b> | <b>-1 1 0 0 2 2 1 1 0 0 -1 1 1 -1 -1 -1 0 -1 0 -2 -1</b> | <b>0</b> | <b>0.2071</b> | <b>1</b> | <b>0.25</b> |
| 381        | -1 1 0 1 -1 0 3 3 -1 0 1 1 1 0 1 -2 -2 0 0 0 -2          | 3        | 3             | 4        | 0           |
| 382        | -1 1 0 1 0 1 1 1 -1 0 1 1 1 -1 -2 0 0 0 0 0 -1 0         | 1        | 1.0989        | 3        | 0.1682      |
| 383        | -1 1 0 1 0 1 3 3 -1 0 1 1 1 -1 0 -2 -2 0 0 -1 -2         | 2        | 2             | 3        | 0           |
| 384        | -1 1 0 1 1 1 1 1 -1 0 0 0 -1 -1 -1 0 -1 1 0 -1 0         | 0        | 0.25          | 1        | 0.25        |
| 385        | -1 1 0 1 1 1 1 2 -1 0 1 1 0 -2 0 0 0 0 0 -2 -1           | 2        | 2             | 3        | 0           |
| 386        | -1 1 0 2 1 1 1 1 -1 0 1 1 -1 -2 0 0 0 0 0 -2 0           | 2        | 2             | 3        | 0           |
| 387        | -1 1 1 -1 -1 -1 2 2 -2 -1 0 0 2 0 2 -1 -1 0 -1 2 -1      | 3        | 3             | 4        | 0           |
| 388        | -1 1 1 -1 -1 1 0 1 -1 -1 1 0 -1 -1 -1 2 0 1 -1 0 0       | 1        | 1.095         | 3        | 0.166       |
| 389        | -1 1 1 0 0 0 1 1 0 0 -1 -1 1 -1 1 0 0 0 0 0 -1           | 1        | 1             | 2        | 0           |
| 390        | -1 1 1 0 0 0 2 1 -1 -1 -1 -1 2 -1 1 0 0 0 0 0 -1         | 2        | 2             | 3        | 0           |
| 391        | -1 1 1 0 1 -1 1 1 0 -1 0 1 -1 -1 -1 1 -1 1 -1 0 -1       | 1        | 1             | 2        | 0           |
| 392        | -1 1 1 0 5 -5 2 -1 1 0 0 2 1 -1 2 -1 -3 -3 0 0 -1        | 3        | 3             | 5        | 0           |



|     |                                                        |   |        |   |        |
|-----|--------------------------------------------------------|---|--------|---|--------|
| 393 | -1 1 1 1 1 -1 2 1 1 -1 0 1 -1 -1 -1 0 -1 1 -1 0 -2     | 1 | 1      | 2 | 0      |
| 394 | -1 1 1 1 1 1 1 1 -1 -1 0 0 1 -1 1 0 0 -1 -1 -2 -1      | 0 | 0.25   | 2 | 0.25   |
| 395 | -1 1 1 1 2 -1 2 -1 1 0 0 0 0 0 0 -1 -1 -1 0 -1 -1      | 1 | 1      | 2 | 0      |
| 396 | -1 1 1 1 2 2 1 3 -2 -1 0 1 1 -2 0 -1 -1 0 -1 -3 -1     | 1 | 1      | 2 | 0      |
| 397 | -1 1 1 1 2 2 2 2 -1 -1 0 0 1 -2 0 -1 0 -1 -1 -3 -2     | 0 | 0      | 1 | 0      |
| 398 | -1 1 1 2 -1 1 2 1 -1 -1 -1 -1 0 0 0 0 0 0 0 -1 -1      | 1 | 1      | 2 | 0      |
| 399 | -1 1 1 2 1 2 1 1 -1 -1 0 0 0 -1 0 0 0 -1 -1 -3 -1      | 0 | 0      | 1 | 0      |
| 400 | -1 1 1 2 1 2 1 2 -2 -1 0 1 0 -1 0 -1 -1 0 -1 -3 0      | 1 | 1      | 2 | 0      |
| 401 | -1 1 1 2 1 2 2 2 -2 -1 0 0 0 -1 0 -1 -1 0 -1 -3 -1     | 0 | 0      | 1 | 0      |
| 402 | -1 1 1 2 2 2 3 3 -2 -2 1 0 1 -2 1 -1 -1 -1 -1 -4 -3    | 0 | 0      | 2 | 0      |
| 403 | -1 1 1 5 1 4 4 2 -4 -2 1 0 -2 -1 -1 -2 -2 1 -1 -5 0    | 0 | 0.2731 | 2 | 0.1695 |
| 404 | -1 1 2 -1 1 -2 1 0 1 -1 -1 0 0 0 0 1 -1 -1 -1 1 -1     | 1 | 1      | 2 | 0      |
| 405 | -1 1 2 0 0 0 0 0 0 0 -1 -1 1 0 1 0 1 -1 -1 0 0         | 1 | 1      | 2 | 0      |
| 406 | -1 1 2 0 0 0 1 0 1 -1 -1 0 -1 1 -2 1 -1 -1 -1 0 -1     | 0 | 0      | 1 | 0      |
| 407 | -1 1 2 0 0 0 1 1 -1 -1 -1 -1 2 -1 1 0 0 0 -1 0 0       | 2 | 2      | 3 | 0      |
| 408 | -1 1 2 0 0 0 1 1 0 0 0 0 1 -1 1 -1 0 -2 -1 0 -1        | 0 | 0.2071 | 2 | 0.25   |
| 409 | -1 1 2 0 1 -1 1 0 1 -1 -1 0 -1 0 -1 1 -1 -1 -1 0 -1    | 0 | 0      | 1 | 0      |
| 410 | -1 1 2 1 0 1 1 1 0 -1 -1 0 1 -2 -1 -1 1 -2 -1 -1 -1    | 0 | 0      | 1 | 0      |
| 411 | -1 1 2 1 0 1 1 2 -1 -1 -1 0 1 -2 -1 -1 0 -1 -1 -1 -1   | 0 | 0      | 1 | 0      |
| 412 | -1 1 2 1 1 0 1 -1 1 0 0 0 -1 0 -2 0 0 0 -1 -1 0        | 0 | 0.2035 | 2 | 0.2107 |
| 413 | -1 1 2 1 2 -1 2 -1 1 -1 -1 0 -1 0 -1 0 -1 -1 -1 -1 -1  | 0 | 0      | 1 | 0      |
| 414 | -1 1 2 1 2 3 1 1 0 -1 -1 0 1 -2 -1 -1 1 -2 -1 -3 -1    | 0 | 0      | 1 | 0      |
| 415 | -1 1 2 1 2 3 1 2 -1 -1 -1 0 1 -2 -1 -1 0 -1 -1 -3 -1   | 0 | 0      | 1 | 0      |
| 416 | -1 1 2 2 0 2 0 2 -2 1 0 -1 -1 -1 -1 -1 -1 1 -1 -2 0    | 0 | 0.2361 | 1 | 0.25   |
| 417 | -1 2 1 -1 1 1 4 4 -1 -2 0 -1 2 -3 0 -1 -1 0 -1 0 -4    | 0 | 0.0437 | 2 | 0.1724 |
| 418 | -1 2 1 0 0 0 2 2 -1 0 -1 -1 1 -1 1 -1 -1 1 -1 0 -1     | 1 | 1.0097 | 2 | 0.0985 |
| 419 | -1 2 1 0 0 0 3 3 -1 -1 -1 -1 1 -2 1 -1 -1 1 -1 0 -2    | 1 | 1      | 2 | 0      |
| 420 | -1 2 2 -1 -2 2 1 0 1 -1 0 -1 -1 0 -1 1 0 -1 -2 0 -1    | 0 | 0      | 1 | 0      |
| 421 | -1 2 2 -1 -1 -1 1 2 -2 -1 -1 0 2 0 2 -1 -1 0 -2 2 0    | 3 | 3      | 4 | 0      |
| 422 | -1 2 2 0 -2 2 1 1 1 -1 0 -1 -1 0 -1 1 0 -1 -2 0 -2     | 0 | 0      | 1 | 0      |
| 423 | -1 2 2 1 0 1 1 1 0 0 -1 -1 0 -1 0 0 0 -1 -1 -1 -1      | 0 | 0.069  | 1 | 0.157  |
| 424 | -1 2 2 1 0 1 2 2 -1 0 -1 -1 0 -1 0 -1 -1 0 -1 -1 -1    | 0 | 0.0833 | 1 | 0.2233 |
| 425 | -1 2 2 1 2 2 1 1 0 -1 -1 0 1 -2 0 -1 1 -2 -2 -3 -1     | 0 | 0      | 1 | 0      |
| 426 | -1 2 2 1 2 3 3 4 -3 -1 0 -1 1 -2 -1 -2 -2 1 -2 -3 -2   | 0 | 0      | 1 | 0      |
| 427 | -1 2 2 2 -1 2 2 2 -1 0 -1 -1 -1 0 -1 -1 -1 0 -1 -1 -1  | 0 | 0      | 1 | 0      |
| 428 | -1 2 2 2 1 2 0 0 0 -1 -1 0 0 -1 0 0 1 -2 -2 -3 0       | 0 | 0      | 1 | 0      |
| 429 | -1 2 2 2 1 2 0 1 -1 -1 -1 0 0 -1 0 0 0 -1 -2 -3 0      | 0 | 0      | 1 | 0      |
| 430 | -1 2 2 3 2 1 0 0 0 -1 0 -1 -1 -2 1 1 0 -2 -2 -3 0      | 0 | 0      | 1 | 0      |
| 431 | -1 2 2 3 4 -1 2 -2 0 -1 0 -1 -1 -2 1 -1 0 -1 -2 -3 0   | 0 | 0      | 1 | 0      |
| 432 | -1 2 3 0 0 0 0 1 -1 0 -1 -1 1 -1 1 0 0 -1 -2 0 0       | 1 | 1      | 2 | 0      |
| 433 | -1 2 3 0 1 -1 0 0 0 1 0 -1 -1 -1 -1 1 -2 1 -2 0 0      | 1 | 1      | 2 | 0      |
| 434 | -1 2 3 1 2 -2 0 0 0 1 0 -1 -2 -2 0 2 -2 1 -2 0 0       | 2 | 2      | 3 | 0      |
| 435 | -1 3 3 0 -3 3 1 1 1 -1 -1 -1 -2 1 -2 1 -1 -1 -3 0 -1   | 0 | 0      | 1 | 0      |
| 436 | -1 3 3 0 0 0 2 3 -3 0 -1 -1 2 -1 1 -2 -2 1 -3 0 0      | 2 | 2      | 3 | 0      |
| 437 | -1 3 3 1 2 3 2 4 -3 -1 -1 -1 1 -2 -1 -2 -2 1 -3 -3 -1  | 0 | 0      | 1 | 0      |
| 438 | -1 3 3 2 -2 1 1 1 0 2 -1 -2 -1 0 1 -2 0 -1 -2 -1 -1    | 1 | 1      | 2 | 0      |
| 439 | -1 3 3 3 3 -3 4 1 3 -2 -1 0 -2 -2 0 -1 -2 0 -3 0 -4    | 0 | 0.0834 | 2 | 0.1114 |
| 440 | -1 3 4 0 -2 2 0 3 -3 0 -2 -2 1 1 0 -1 -1 1 -3 0 0      | 2 | 2      | 3 | 0      |
| 441 | -1 3 4 3 -1 4 3 3 -3 -1 -1 -1 -1 -1 -1 -2 -2 0 -3 -3 0 | 0 | 0.0001 | 2 | 0.0323 |
| 442 | -1 3 4 3 0 3 3 3 -3 -1 -1 -1 -1 -2 0 -2 -2 0 -3 -3 0   | 0 | 0.0083 | 2 | 0.0999 |

|     |                                                       |    |        |    |        |
|-----|-------------------------------------------------------|----|--------|----|--------|
| 443 | -1 4 3 1 1 1 3 4 -1 -1 -1 -1 1 -3 1 -1 -1 -1 -3 -2 -3 | 0  | 0      | 2  | 0      |
| 444 | -1 4 4 2 -2 1 2 2 -1 2 -2 -2 -1 0 1 -2 0 -1 -3 -1 -2  | 1  | 1      | 2  | 0      |
| 445 | -1 4 4 2 3 -2 3 -3 1 2 -2 -2 -2 -1 0 -1 1 1 -3 -2 -1  | 2  | 2      | 3  | 0      |
| 446 | -1 4 4 5 4 -7 5 -2 3 2 -2 0 -1 -2 3 -4 0 -3 -3 -2 -3  | 2  | 2.0941 | 4  | 0.2057 |
| 447 | -1 4 5 2 -2 2 -1 1 -2 2 -1 -3 -1 -1 1 -1 0 0 -4 -2 1  | 1  | 1.1787 | 3  | 0.2295 |
| 448 | -1 5 6 3 -3 3 3 5 -5 1 -1 -2 1 -1 -1 -4 -4 1 -5 -3 0  | 1  | 1      | 3  | 0      |
| 449 | -1 6 6 3 -2 3 3 2 -5 2 -2 -2 -2 -2 -1 -1 0 1 -5 -3 0  | 2  | 2      | 4  | 0      |
| 450 | -1 6 7 3 -2 3 -1 2 -3 2 -2 -4 -2 -2 1 -1 0 0 -6 -3 1  | 1  | 1      | 3  | 0      |
| 451 | 0 -2 -2 0 0 0 -1 1 -1 2 2 0 -2 1 -1 0 -2 2 2 0 1      | 3  | 3      | 5  | 0      |
| 452 | 0 -2 2 0 0 0 0 -2 -2 1 1 0 -1 1 0 1 1 0 0 0 2         | 4  | 4      | 5  | 0      |
| 453 | 0 -1 -1 -5 5 0 -1 -1 1 4 3 0 1 -2 -1 0 -2 0 1 0 1     | 6  | 6      | 8  | 0      |
| 454 | 0 -1 -1 -5 5 0 0 0 0 4 3 0 1 -2 -1 -1 -3 1 1 0 0      | 5  | 5      | 7  | 0      |
| 455 | 0 -1 -1 -1 1 0 -1 -1 0 1 1 -1 0 1 1 1 -1 2 1 0 1      | 5  | 5      | 6  | 0      |
| 456 | 0 -1 -1 -1 2 1 0 -1 1 2 2 0 -1 -1 -1 1 -1 0 1 -1 0    | 3  | 3      | 4  | 0      |
| 457 | 0 -1 -1 0 0 0 -1 -1 -1 2 1 0 -2 2 -1 -1 -1 1 1 0 1    | 2  | 2      | 4  | 0      |
| 458 | 0 -1 -1 0 0 0 -1 -1 0 1 1 -1 -1 2 1 1 -1 2 1 0 1      | 5  | 5      | 6  | 0      |
| 459 | 0 -1 -1 0 0 0 -1 -1 1 2 1 0 -2 1 -1 0 0 0 1 0 1       | 2  | 2      | 4  | 0      |
| 460 | 0 -1 -1 0 0 0 0 -1 1 1 1 -1 -1 1 1 1 0 1 1 0 0        | 4  | 4      | 5  | 0      |
| 461 | 0 -1 -1 0 0 0 0 0 0 1 1 -1 -1 1 1 1 1 -1 2 1 0 0      | 4  | 4      | 5  | 0      |
| 462 | 0 -1 -1 0 0 0 0 0 0 2 1 0 -2 1 -1 -1 -1 1 1 0 0       | 1  | 1      | 3  | 0      |
| 463 | 0 -1 1 0 0 0 2 0 2 -1 1 1 1 1 -1 -1 -1 -2 0 0 -2      | 1  | 1      | 2  | 0      |
| 464 | 0 -1 1 1 2 3 3 3 -1 -2 1 0 1 -2 -1 -1 -1 -1 0 -3 -3   | 0  | 0      | 1  | 0      |
| 465 | 0 -1 1 2 0 2 2 2 0 -2 1 0 0 -1 -1 0 -1 -1 0 -2 -2     | 0  | 0      | 1  | 0      |
| 466 | 0 -1 1 2 1 3 2 2 -1 -2 1 0 0 -1 -1 0 -1 -1 0 -3 -2    | 0  | 0      | 1  | 0      |
| 467 | 0 0 0 -7 4 -5 -3 2 5 4 2 -1 3 -2 1 0 -2 -1 0 3 -2     | 7  | 7      | 9  | 0      |
| 468 | 0 0 0 -7 5 -6 -1 -5 -4 4 1 -2 3 -1 2 -2 1 4 0 2 5     | 10 | 10     | 12 | 0      |
| 469 | 0 0 0 -5 4 -4 0 -3 -3 3 1 -1 2 -1 1 -2 0 3 0 1 3      | 6  | 6.182  | 8  | 0.1553 |
| 470 | 0 0 0 -4 0 -4 -1 -1 1 3 0 -2 1 1 2 0 0 1 0 4 1        | 6  | 6      | 8  | 0      |
| 471 | 0 0 0 -4 0 -4 0 0 0 3 0 -2 1 1 2 -1 -1 2 0 4 0        | 5  | 5      | 7  | 0      |
| 472 | 0 0 0 -4 1 -3 -1 -1 0 2 1 -1 2 -1 1 -1 1 2 0 3 1      | 6  | 6      | 7  | 0      |
| 473 | 0 0 0 -4 3 -3 -4 -1 3 1 2 2 2 -2 2 2 0 -2 0 3 1       | 8  | 8      | 9  | 0      |
| 474 | 0 0 0 -4 4 0 -4 -4 -2 2 1 -2 2 -1 1 2 1 2 0 0 6       | 8  | 8.0275 | 10 | 0.1268 |
| 475 | 0 0 0 -4 4 0 -1 -1 -1 2 2 0 2 -2 -1 -1 -1 1 0 0 1     | 3  | 3.0656 | 5  | 0.2394 |
| 476 | 0 0 0 -3 -1 -3 -1 1 -1 2 0 -2 1 2 2 0 -2 2 0 4 1      | 5  | 5.0883 | 7  | 0.2088 |
| 477 | 0 0 0 -3 0 -3 -1 1 1 2 1 -1 1 1 1 0 -1 1 0 3 -1       | 5  | 5      | 6  | 0      |
| 478 | 0 0 0 -3 1 -3 -1 2 2 2 2 -1 1 1 1 0 -2 0 0 2 -2       | 5  | 5      | 6  | 0      |
| 479 | 0 0 0 -3 2 -3 0 -2 -2 2 1 -1 1 0 1 -1 0 2 0 1 2       | 5  | 5      | 6  | 0      |
| 480 | 0 0 0 -3 3 -2 -1 -3 -2 2 1 -2 1 -1 0 0 1 2 0 0 3      | 5  | 5      | 6  | 0      |
| 481 | 0 0 0 -3 3 -1 -2 -1 1 1 2 1 2 -2 0 0 0 0 0 1 1        | 5  | 5      | 6  | 0      |
| 482 | 0 0 0 -3 3 -1 0 -1 -1 2 1 -1 1 -1 1 -1 -1 0 0 0 1     | 3  | 3      | 4  | 0      |
| 483 | 0 0 0 -3 3 -1 0 0 0 2 1 -1 1 -1 1 -1 -2 -1 0 0 0      | 2  | 2      | 3  | 0      |
| 484 | 0 0 0 -3 3 0 -1 -1 -1 2 2 0 1 -2 1 0 0 0 0 0 2        | 4  | 4.1432 | 6  | 0.1845 |
| 485 | 0 0 0 -3 3 0 0 0 0 1 1 -1 2 -1 1 -2 -2 0 0 0 0        | 1  | 1      | 3  | 0      |
| 486 | 0 0 0 -2 -1 -2 -2 2 1 2 2 -1 0 1 1 2 -2 0 0 3 0       | 6  | 6      | 7  | 0      |
| 487 | 0 0 0 -2 0 -2 -2 2 2 2 2 -1 0 0 1 2 -2 -1 0 2 0       | 5  | 5      | 6  | 0      |
| 488 | 0 0 0 -2 0 -2 -1 -1 0 2 0 -1 0 1 1 0 0 1 0 2 1        | 4  | 4      | 5  | 0      |
| 489 | 0 0 0 -2 0 -2 -1 1 1 2 2 -1 0 1 1 1 -2 0 0 2 0        | 5  | 5      | 6  | 0      |
| 490 | 0 0 0 -2 1 -2 0 -1 -1 2 2 -1 0 1 1 0 -1 1 0 1 1       | 5  | 5      | 6  | 0      |
| 491 | 0 0 0 -2 1 -1 -2 -1 -1 2 1 -1 0 1 1 1 -1 1 0 1 2      | 5  | 5      | 6  | 0      |
| 492 | 0 0 0 -2 1 -1 -1 -1 -1 2 2 -1 0 1 1 1 -1 1 0 1 2      | 6  | 6      | 7  | 0      |

|            |                                                         |          |             |          |             |
|------------|---------------------------------------------------------|----------|-------------|----------|-------------|
| 493        | 0 0 0 -2 1 -1 0 -5 5 1 -1 -3 1 3 3 -1 1 -2 0 1 0        | 5        | 5           | 7        | 0           |
| 494        | 0 0 0 -2 1 2 -1 -1 1 2 1 1 0 1 -1 0 -1 -1 0 -1 0        | 3        | 3           | 4        | 0           |
| 495        | 0 0 0 -2 2 -2 -2 -2 -2 2 0 -1 0 0 1 0 0 1 0 0 2         | 3        | 3           | 4        | 0           |
| 496        | 0 0 0 -2 2 0 -2 -2 -1 1 1 -1 1 0 1 1 0 1 0 0 3          | 5        | 5           | 6        | 0           |
| 497        | 0 0 0 -2 2 0 -2 -2 0 0 0 -1 1 -1 1 1 1 1 0 0 2          | 3        | 3.0811      | 4        | 0.141       |
| 498        | 0 0 0 -2 2 0 -1 -1 -1 1 1 -1 1 -1 -1 0 0 1 0 0 1        | 2        | 2           | 3        | 0           |
| 499        | 0 0 0 -2 2 0 -1 1 -1 1 3 2 1 0 -2 0 -3 2 0 0 1          | 5        | 5           | 7        | 0           |
| 500        | 0 0 0 -1 -1 -2 -2 -2 0 2 0 -1 -1 2 1 1 0 1 0 2 2        | 5        | 5           | 6        | 0           |
| 501        | 0 0 0 -1 -1 -1 -1 1 0 2 1 -1 -1 1 1 2 -1 1 0 2 0        | 5        | 5           | 6        | 0           |
| 502        | 0 0 0 -1 -1 -1 0 0 0 2 1 -1 -1 1 1 2 -1 1 0 2 0         | 5        | 5           | 6        | 0           |
| 503        | 0 0 0 -1 -1 2 -1 -1 0 2 1 1 -1 2 -1 1 -1 -1 0 0 1       | 4        | 4           | 5        | 0           |
| 504        | 0 0 0 -1 0 -1 -2 -2 0 2 0 -1 -1 2 1 1 0 1 0 1 2         | 5        | 5           | 6        | 0           |
| 505        | 0 0 0 -1 0 -1 0 -1 -1 2 2 -1 -1 1 1 1 -1 1 0 1 1        | 5        | 5           | 6        | 0           |
| 506        | 0 0 0 -1 0 -1 0 0 0 1 0 -1 0 1 1 0 -1 1 0 1 0           | 2        | 2           | 3        | 0           |
| 507        | 0 0 0 -1 1 -1 0 -1 -1 1 1 -1 0 0 0 0 0 1 0 0 1          | 2        | 2           | 3        | 0           |
| 508        | 0 0 0 -1 1 -1 0 0 0 0 1 1 1 -1 0 -1 -1 1 0 1 0          | 2        | 2           | 3        | 0           |
| 509        | 0 0 0 -1 1 0 0 0 0 1 0 -1 0 0 0 0 -1 1 0 0 0            | 1        | 1           | 2        | 0           |
| 510        | 0 0 0 0 0 0 0 -1 -1 1 1 -1 -1 1 -1 0 0 1 0 0 1          | 2        | 2           | 3        | 0           |
| 511        | 0 0 0 0 0 0 0 0 0 -1 0 -1 0 0 1 1 0 -1 0 0 0            | 0        | 0           | 1        | 0           |
| 512        | 0 0 0 0 0 0 0 0 0 -1 1 1 -1 -1 -1 1 1 -1 0 0 0          | 1        | 1           | 2        | 0           |
| 513        | 0 1 -1 -5 6 2 -2 -2 2 4 1 1 1 -2 -1 -1 -2 -1 0 -2 0     | 4        | 4           | 6        | 0           |
| 514        | 0 1 -1 -4 1 4 -1 -1 0 2 0 2 2 -1 -2 -1 1 -2 0 0 1       | 4        | 4           | 5        | 0           |
| 515        | 0 1 -1 -3 3 1 -3 -3 0 1 0 2 2 -1 -2 1 1 -1 0 0 3        | 5        | 5           | 6        | 0           |
| 516        | 0 1 -1 -3 4 1 0 -1 1 2 1 1 1 -2 -1 -1 -1 0 0 -1 0       | 3        | 3           | 4        | 0           |
| 517        | 0 1 -1 -3 4 2 0 -2 2 2 1 1 1 -2 -1 -1 0 -1 0 -2 0       | 3        | 3           | 4        | 0           |
| 518        | 0 1 -1 -3 4 2 2 2 -2 3 0 1 0 -1 -1 -3 -3 1 0 -2 0       | 2        | 2           | 4        | 0           |
| 519        | 0 1 -1 -2 1 1 -3 -1 -3 1 0 -1 0 0 0 2 0 2 0 0 4         | 5        | 5           | 6        | 0           |
| 520        | 0 1 -1 -2 2 -1 0 -3 -3 1 -1 1 1 0 -1 -1 1 2 0 0 3       | 4        | 4           | 5        | 0           |
| 521        | 0 1 -1 -1 0 1 -1 -1 0 2 0 2 -1 2 -1 1 -1 -2 0 0 1       | 4        | 4           | 5        | 0           |
| 522        | 0 1 -1 -1 1 -1 0 3 3 1 1 0 0 -1 2 1 -2 -2 0 1 -3        | 3        | 3           | 4        | 0           |
| 523        | 0 1 -1 -1 1 0 -3 -1 -3 1 0 -1 -1 0 1 2 0 2 0 0 4        | 5        | 5           | 6        | 0           |
| 524        | 0 1 -1 -1 1 0 -2 -1 1 1 0 2 0 1 -1 1 -1 -2 0 0 1        | 3        | 3           | 4        | 0           |
| 525        | 0 1 -1 -1 1 0 -1 0 -1 1 0 0 0 0 1 0 -1 0 0 0 1          | 2        | 2           | 3        | 0           |
| 526        | 0 1 1 -1 1 0 -1 -1 1 1 1 0 0 1 -1 1 -1 -1 -1 0 1        | 3        | 3           | 4        | 0           |
| 527        | 0 1 1 0 2 2 -1 -2 1 1 0 -2 -1 0 -1 1 0 1 -1 -2 1        | 2        | 2           | 3        | 0           |
| 528        | 0 1 1 0 5 5 -2 -3 1 2 1 -3 -2 -1 -3 2 -1 2 -1 -5 2      | 3        | 3           | 5        | 0           |
| <b>529</b> | <b>0 1 1 1 1 -1 1 -1 1 0 0 -1 -1 -1 1 0 0 0 -1 0 -1</b> | <b>0</b> | <b>0.25</b> | <b>1</b> | <b>0.25</b> |
| 530        | 0 1 1 2 1 -2 1 -1 -1 1 0 1 -1 1 0 -1 -1 0 -1 -1 0       | 2        | 2           | 3        | 0           |
| 531        | 0 1 1 4 4 -5 3 -3 0 1 0 2 -1 -1 2 -3 0 -2 -1 -3 0       | 2        | 2.3249      | 4        | 0.1815      |
| 532        | 0 1 1 4 5 -7 2 -5 -3 2 0 3 -2 -1 3 -2 1 0 -1 -2 3       | 7        | 7           | 9        | 0           |
| 533        | 0 1 1 6 5 -7 4 -5 -1 2 0 3 -2 -1 3 -4 1 -2 -1 -4 1      | 5        | 5           | 7        | 0           |
| 534        | 0 2 -2 -3 3 2 -1 -1 -1 1 0 2 2 -2 -2 -1 0 0 0 0 1       | 3        | 3.0349      | 4        | 0.1041      |
| 535        | 0 2 -2 -3 4 2 -1 1 -2 1 0 1 2 -2 -1 -1 -2 1 0 -1 1      | 3        | 3.0522      | 4        | 0.2413      |
| 536        | 0 2 -2 -2 2 0 -3 -2 -3 1 -1 0 0 -1 1 2 1 2 0 0 5        | 6        | 6.0637      | 7        | 0.228       |
| 537        | 0 2 -2 0 2 -2 0 -2 -2 1 -1 1 -1 -1 1 0 1 1 0 0 2        | 3        | 3.2361      | 4        | 0.25        |
| 538        | 0 2 -2 0 5 5 -2 -2 2 1 0 0 -1 -2 -3 1 -1 1 0 -5 0       | 1        | 1.2107      | 3        | 0.2346      |
| 539        | 0 2 2 -1 1 1 3 3 0 -2 0 -1 2 -3 0 -1 0 -1 -2 0 -3       | 0        | 0.0334      | 2        | 0.2183      |
| 540        | 0 2 2 1 -1 1 1 1 -1 1 -1 -1 -1 0 0 0 0 0 -2 -1 -1       | 0        | 0.1278      | 1        | 0.1768      |
| 541        | 0 2 2 1 -1 1 1 1 -1 1 0 -1 1 -1 0 -2 -1 0 -2 -1 0       | 1        | 1           | 2        | 0           |
| 542        | 0 2 2 1 1 -1 2 -2 1 1 0 -1 -2 -1 0 0 0 0 -2 0 -1        | 1        | 1           | 2        | 0           |

|     |                                                         |    |         |    |        |
|-----|---------------------------------------------------------|----|---------|----|--------|
| 543 | 0 2 2 1 1 -1 3 -3 0 1 0 -1 -2 -1 0 -1 1 1 -2 0 0        | 2  | 2.0035  | 3  | 0.1258 |
| 544 | 0 2 2 1 3 -3 1 -1 1 0 0 0 -2 -2 1 1 -1 -1 -2 0 -1       | 0  | 0.365   | 2  | 0.2117 |
| 545 | 0 2 2 5 6 -7 5 -4 1 1 0 2 -1 -2 3 -4 0 -3 -2 -4 -1      | 3  | 3       | 5  | 0      |
| 546 | 0 3 -3 -3 3 0 -3 -3 -3 2 0 1 1 0 2 2 0 2 0 0 6          | 10 | 10.1105 | 12 | 0.1165 |
| 547 | 0 3 3 -1 1 1 4 5 -1 -2 0 -1 2 -4 0 -2 -1 -1 -3 0 -4     | 0  | 0       | 2  | 0      |
| 548 | 0 3 3 1 -2 1 1 1 -1 1 -1 -1 0 0 0 -1 0 -1 -3 0 -1       | 1  | 1       | 2  | 0      |
| 549 | 0 3 3 1 1 1 3 3 0 -2 0 -1 1 -3 1 -1 0 -2 -3 -2 -3       | 0  | 0       | 2  | 0      |
| 550 | 0 3 3 1 1 1 3 4 -1 -2 0 -1 1 -3 1 -1 -1 -1 -3 -2 -3     | 0  | 0       | 2  | 0      |
| 551 | 0 3 3 2 2 -2 3 -3 0 1 -1 -1 -2 -1 0 -1 1 1 -3 -1 0      | 2  | 2.0178  | 3  | 0.25   |
| 552 | 0 3 3 2 3 -3 2 -3 3 0 -1 -2 -2 -2 2 0 1 -1 -3 0 -2      | 1  | 1.1565  | 2  | 0.1695 |
| 553 | 0 3 3 2 4 -2 1 -1 -1 -1 -1 0 -2 -1 -1 1 -2 1 -3 -2 0    | 0  | 0.067   | 2  | 0.1508 |
| 554 | 0 3 3 3 -2 2 3 1 -3 1 -1 -1 -2 0 -1 -1 0 1 -3 -2 -1     | 1  | 1.0164  | 2  | 0.2309 |
| 555 | 0 3 3 3 -1 3 1 2 -2 1 -1 -2 -1 -1 -1 -1 -2 -1 1 -3 -3 0 | 0  | 0       | 1  | 0      |
| 556 | 0 3 3 3 6 -3 2 -2 -2 -1 -1 1 -3 -2 -1 1 -2 1 -3 -3 0    | 1  | 1       | 3  | 0      |
| 557 | 0 3 3 5 4 -7 5 -2 3 1 -1 1 -1 -2 3 -4 0 -3 -3 -2 -3     | 2  | 2       | 4  | 0      |
| 558 | 0 3 3 5 5 -7 5 -3 2 1 -1 1 -1 -2 3 -4 0 -3 -3 -3 -2     | 2  | 2       | 4  | 0      |
| 559 | 0 4 4 1 2 -2 2 -2 1 1 -2 -2 -1 0 0 -1 0 1 -4 -1 -1      | 1  | 1       | 2  | 0      |
| 560 | 0 4 4 2 -4 4 1 0 -1 -1 -1 -2 -2 1 -2 1 1 -1 -4 0 0      | 1  | 1.1946  | 3  | 0.1836 |
| 561 | 0 4 4 2 -2 2 2 2 -2 1 -2 -2 -1 0 0 -1 0 0 -4 -2 -2      | 0  | 0       | 1  | 0      |
| 562 | 0 4 4 2 -2 2 2 4 -4 0 -1 -1 1 -1 -1 -3 -3 1 -4 -2 0     | 0  | 0.0393  | 2  | 0.124  |
| 563 | 0 5 5 -1 -1 1 -1 1 -2 -1 -2 -2 1 -2 1 1 1 -1 -5 0 1     | 1  | 1.0109  | 3  | 0.1264 |
| 564 | 0 5 5 1 -1 1 1 0 -1 1 -2 -2 -1 -2 1 -1 2 -2 -5 -1 0     | 0  | 0.0168  | 2  | 0.1472 |
| 565 | 0 5 5 3 -3 3 3 4 -4 1 -1 -2 1 -1 -1 -4 -3 1 -5 -3 0     | 1  | 1       | 3  | 0      |
| 566 | 0 6 6 1 1 -1 2 -1 -1 1 -2 -2 -1 1 -3 -1 -3 3 -6 -1 0    | 1  | 1       | 3  | 0      |
| 567 | 0 6 6 1 3 -3 2 -2 2 1 -3 -3 -1 0 0 -1 -1 1 -6 -1 -2     | 0  | 0       | 2  | 0      |
| 568 | 0 6 6 2 -2 2 2 2 -4 1 -2 -2 -1 -2 0 -1 0 0 -6 -2 0      | 1  | 1       | 3  | 0      |
| 569 | 0 7 7 1 3 -3 2 -2 2 1 -3 -3 -1 0 -1 -1 -2 1 -7 -1 -2    | 0  | 0       | 2  | 0      |
| 570 | 0 8 8 2 -2 2 1 3 -4 1 -3 -3 -1 -3 1 -1 0 -1 -8 -2 0     | 0  | 0       | 3  | 0      |
| 571 | 1 -1 -2 -1 2 1 -2 1 1 1 2 1 -1 -1 -2 1 -2 1 1 -1 0      | 3  | 3       | 4  | 0      |
| 572 | 1 -1 -2 -1 3 -3 -1 -3 -3 1 1 1 -1 -1 2 -1 1 1 1 0 3     | 5  | 5       | 6  | 0      |
| 573 | 1 -1 -1 -2 2 -1 -1 -2 -1 0 1 2 1 0 -1 0 0 0 1 0 2       | 4  | 4       | 5  | 0      |
| 574 | 1 -1 1 1 4 -4 3 -1 2 -2 2 2 1 -1 1 -2 -2 -3 0 -1 -2     | 2  | 2       | 4  | 0      |
| 575 | 1 -1 1 1 5 -5 3 -2 1 -2 2 2 1 -1 2 -2 -2 -3 0 -1 -1     | 3  | 3       | 5  | 0      |
| 576 | 1 -1 1 1 8 -8 3 -4 -1 -3 3 3 2 -2 4 -3 -2 -3 0 -1 1     | 6  | 6       | 9  | 0      |
| 577 | 1 -1 1 1 8 -8 3 -3 0 -3 3 3 2 -2 4 -3 -3 -4 0 -1 0      | 5  | 5       | 8  | 0      |
| 578 | 1 -1 1 2 0 2 1 0 -1 -3 2 0 0 -2 -1 2 2 0 0 -2 0         | 3  | 3       | 5  | 0      |
| 579 | 1 -1 1 3 8 -6 5 -3 2 -3 3 3 0 -2 2 -3 -3 -4 0 -3 -2     | 3  | 3       | 6  | 0      |
| 580 | 1 0 -1 -2 1 -1 2 1 1 1 1 0 0 1 1 -1 -2 0 0 1 -2         | 3  | 3       | 4  | 0      |
| 581 | 1 0 -1 -2 2 -1 -1 -2 -2 0 0 2 1 0 -1 0 0 0 0 0 2        | 3  | 3       | 4  | 0      |
| 582 | 1 0 -1 -2 2 -1 -1 -1 -1 0 0 2 1 0 -1 0 -1 -1 0 0 1      | 2  | 2       | 3  | 0      |
| 583 | 1 1 -2 -3 1 -3 -1 -3 -3 1 -1 1 1 1 1 -1 1 2 0 2 3       | 6  | 6       | 7  | 0      |
| 584 | 1 1 -2 -2 1 1 -3 -1 -3 0 0 0 0 0 0 2 0 2 0 0 4          | 5  | 5       | 6  | 0      |
| 585 | 1 1 -2 -2 2 -2 -3 -4 -2 2 -1 1 -1 1 1 0 1 1 0 0 4       | 5  | 5.0263  | 7  | 0.2163 |
| 586 | 1 1 -1 -6 2 -6 -1 -4 -3 3 -1 -1 2 1 2 -2 1 4 -1 4 4     | 9  | 9       | 11 | 0      |
| 587 | 1 1 -1 -5 2 -5 -2 -4 -2 3 -1 -1 1 1 2 -1 1 3 -1 3 4     | 8  | 8       | 10 | 0      |
| 588 | 1 1 -1 -5 2 -4 -3 -4 -1 3 -1 -1 1 1 2 0 1 2 -1 3 4      | 8  | 8       | 10 | 0      |
| 589 | 1 1 -1 -5 2 -3 -5 1 5 3 1 1 1 -2 -1 2 -2 -1 -1 3 0      | 6  | 6       | 8  | 0      |
| 590 | 1 1 -1 -5 2 -3 4 4 1 3 -1 -1 1 1 2 -3 -3 1 -1 3 -5      | 4  | 4       | 6  | 0      |
| 591 | 1 1 -1 -5 3 -4 -2 2 4 2 1 0 2 -1 1 0 -2 -1 -1 2 -2      | 4  | 4.2859  | 6  | 0.1825 |
| 592 | 1 1 -1 -5 4 -4 -1 -4 -3 2 0 -1 2 -1 1 -1 1 3 -1 1 4     | 6  | 6.2804  | 8  | 0.1734 |

|     |                                                      |   |        |    |        |
|-----|------------------------------------------------------|---|--------|----|--------|
| 593 | 1 1 -1 -5 5 -1 0 -2 -2 2 1 1 2 -2 -1 -2 -1 2 -1 0 2  | 4 | 4.0558 | 6  | 0.1579 |
| 594 | 1 1 -1 -5 6 -2 0 -2 -2 3 2 1 1 -2 1 -1 -2 1 -1 0 2   | 6 | 6      | 8  | 0      |
| 595 | 1 1 -1 -4 1 -4 -3 -4 -1 3 -1 -1 0 2 2 0 1 2 -1 3 4   | 8 | 8      | 10 | 0      |
| 596 | 1 1 -1 -4 1 -3 -4 1 4 2 1 1 1 -1 0 2 -2 -1 -1 3 0    | 5 | 5.1471 | 7  | 0.1509 |
| 597 | 1 1 -1 -4 2 -3 -2 -3 -1 2 -1 -1 1 0 1 0 1 2 -1 2 3   | 5 | 5.253  | 7  | 0.2063 |
| 598 | 1 1 -1 -4 2 -2 -3 -3 -1 2 -1 -1 1 0 1 1 1 2 -1 2 4   | 6 | 6.2398 | 8  | 0.2005 |
| 599 | 1 1 -1 -4 4 -4 -1 -4 -4 2 0 -1 1 -1 1 -1 1 3 -1 0 4  | 5 | 5.1721 | 7  | 0.1879 |
| 600 | 1 1 -1 -3 1 -3 -1 1 2 1 0 0 1 0 1 0 -1 0 -1 2 -1     | 3 | 3.0038 | 4  | 0.0626 |
| 601 | 1 1 -1 -3 1 -3 -1 2 2 1 1 0 1 1 1 0 -2 0 -1 2 -2     | 4 | 4      | 5  | 0      |
| 602 | 1 1 -1 -3 2 -3 -1 2 3 1 1 0 1 0 1 0 -2 -1 -1 1 -2    | 3 | 3      | 4  | 0      |
| 603 | 1 1 -1 -3 2 -2 -1 -2 -1 1 0 0 1 0 1 0 0 1 -1 1 2     | 4 | 4.0391 | 5  | 0.119  |
| 604 | 1 1 -1 -2 1 -2 -1 -2 -1 1 0 0 0 1 1 0 0 1 -1 1 2     | 4 | 4      | 5  | 0      |
| 605 | 1 1 -1 -2 5 3 -2 -2 2 2 1 0 -1 -2 -3 1 -1 1 -1 -3 0  | 2 | 2      | 4  | 0      |
| 606 | 1 1 2 1 1 2 4 4 -2 -2 1 -1 1 -2 -1 -2 -2 1 -2 -2 -3  | 0 | 0.0355 | 1  | 0.25   |
| 607 | 1 1 2 1 3 -3 2 -2 0 -1 0 0 0 -1 1 -1 0 -1 -2 -1 0    | 1 | 1      | 2  | 0      |
| 608 | 1 1 2 4 4 -5 3 -3 0 0 0 1 -1 -1 2 -3 0 -2 -2 -3 0    | 1 | 1.2736 | 3  | 0.1773 |
| 609 | 1 2 -2 -5 5 -5 -2 -5 -5 3 -1 -1 1 -1 1 -1 1 4 -1 0 5 | 7 | 7      | 9  | 0      |
| 610 | 1 2 -2 -3 5 2 -2 -2 2 0 0 -1 3 -2 1 -1 -1 -1 -1 -2 0 | 2 | 2.093  | 4  | 0.2118 |
| 611 | 1 2 -2 -2 2 -2 -2 -4 -2 2 -1 1 -1 1 1 0 1 1 -1 0 4   | 5 | 5.0279 | 7  | 0.2116 |
| 612 | 1 2 -2 -1 3 -3 -2 -3 -4 1 -1 0 -1 -1 2 1 1 2 -1 0 4  | 5 | 5      | 6  | 0      |
| 613 | 1 2 -2 -1 3 -3 0 -3 -3 1 -1 1 -1 -1 1 -1 1 2 -1 0 3  | 4 | 4      | 5  | 0      |
| 614 | 1 2 -1 -5 6 2 -2 -2 2 3 0 1 1 -2 -1 -1 -2 -1 -1 -2 0 | 3 | 3      | 5  | 0      |
| 615 | 1 2 2 1 -4 4 2 0 -2 -1 1 0 0 1 -1 -1 -1 -1 -3 -1 0   | 1 | 1.152  | 3  | 0.196  |
| 616 | 1 2 2 2 1 -2 3 -3 1 0 0 -2 -2 -1 2 -1 1 1 -3 0 -1    | 2 | 2      | 3  | 0      |
| 617 | 1 2 2 2 1 -2 3 -3 1 0 0 -1 -2 -1 1 -1 1 0 -3 0 -1    | 1 | 1      | 2  | 0      |
| 618 | 1 2 2 3 -2 1 3 2 -3 0 0 0 -2 0 -1 -1 0 1 -3 -1 -2    | 1 | 1      | 2  | 0      |
| 619 | 1 2 2 3 -2 3 3 1 -3 -1 0 -1 -1 0 -1 -2 -2 1 -2 -3 0  | 0 | 0      | 1  | 0      |
| 620 | 1 2 2 4 -4 4 4 1 -4 0 1 0 -1 1 -1 -3 -2 1 -3 -4 0    | 1 | 1.2159 | 3  | 0.1933 |
| 621 | 1 2 2 4 3 -5 4 -2 2 0 0 1 -1 -1 2 -3 0 -2 -3 -2 -2   | 1 | 1.3659 | 3  | 0.2012 |
| 622 | 1 2 2 4 4 -5 4 -3 1 0 0 1 -1 -1 2 -3 0 -2 -3 -3 -1   | 1 | 1.2955 | 3  | 0.187  |
| 623 | 1 2 3 1 6 -6 2 -2 -1 -1 0 1 0 -2 2 -1 -2 -1 -3 -1 0  | 2 | 2      | 4  | 0      |
| 624 | 1 2 3 2 5 -4 2 -2 0 -1 0 0 -1 -2 1 -1 -1 -1 -3 -2 0  | 0 | 0.3225 | 2  | 0.1917 |
| 625 | 1 2 3 2 6 -5 2 -2 -1 -1 0 1 -1 -2 1 -1 -2 -1 -3 -2 0 | 1 | 1      | 3  | 0      |
| 626 | 1 2 3 5 4 -7 5 -2 3 0 0 1 -1 -2 3 -4 0 -3 -3 -2 -3   | 2 | 2      | 4  | 0      |
| 627 | 1 2 3 5 6 -7 5 -4 1 0 0 1 -1 -2 3 -4 0 -3 -3 -4 -1   | 2 | 2      | 4  | 0      |
| 628 | 1 3 -3 -1 3 -3 -1 -4 -3 1 -2 1 -1 -1 1 0 2 2 -1 0 4  | 5 | 5      | 6  | 0      |
| 629 | 1 3 3 2 -5 6 2 0 -2 -1 1 0 -1 1 -2 -1 -1 -2 -4 -2 0  | 1 | 1      | 3  | 0      |
| 630 | 1 3 3 2 2 -3 3 -3 2 0 -1 -2 -2 -1 2 -1 1 0 -4 0 -2   | 1 | 1      | 2  | 0      |
| 631 | 1 3 3 3 1 -3 3 -3 2 0 -1 -1 -1 0 1 -2 1 -1 -4 -1 -1  | 1 | 1.0178 | 2  | 0.25   |
| 632 | 1 4 3 2 -2 2 2 3 -3 0 -1 -1 1 -1 -1 -3 -2 1 -4 -2 0  | 0 | 0.1265 | 2  | 0.2018 |
| 633 | 1 6 5 2 -2 2 2 5 -5 -1 -2 -1 1 -2 -1 -3 -3 1 -6 -2 0 | 0 | 0      | 2  | 0      |
| 634 | 2 1 -3 -2 2 -2 -3 -4 -3 1 -1 2 -1 1 1 0 1 1 0 0 4    | 5 | 5.1446 | 7  | 0.208  |
| 635 | 2 1 -3 -2 3 -3 -4 -5 -3 2 -1 2 -2 1 2 0 1 1 0 0 5    | 7 | 7      | 9  | 0      |
| 636 | 2 1 -1 -2 6 -5 -2 -2 -2 -1 1 4 1 -2 1 1 -2 -1 -1 0 2 | 5 | 5      | 7  | 0      |
| 637 | 2 2 -2 -6 2 -4 -4 2 4 2 1 1 2 -1 1 2 -3 -1 -2 4 0    | 7 | 7      | 9  | 0      |
| 638 | 2 2 -2 -6 4 -5 -1 -4 -3 2 -1 -1 2 -1 1 -1 1 4 -2 2 4 | 7 | 7.0094 | 9  | 0.076  |
| 639 | 2 2 -2 -6 4 -4 -2 -4 -2 2 -1 -1 2 -1 1 0 1 3 -2 2 4  | 7 | 7.0049 | 9  | 0.0702 |
| 640 | 2 2 -2 -6 5 -6 -1 5 6 2 1 0 2 -1 2 -1 -4 -2 -2 1 -5  | 4 | 4      | 6  | 0      |
| 641 | 2 2 -2 -6 6 -4 -2 -6 -4 2 0 -1 2 -2 1 0 2 3 -2 0 6   | 8 | 8      | 10 | 0      |
| 642 | 2 2 -2 -5 4 3 -5 -2 -5 1 0 -2 1 -2 -2 4 0 4 -2 0 7   | 8 | 8      | 10 | 0      |

|     |                                                        |   |        |   |        |
|-----|--------------------------------------------------------|---|--------|---|--------|
| 643 | 2 2 -2 -5 5 -2 -1 3 4 2 1 2 1 -1 0 -1 -4 -2 -2 0 -3    | 3 | 3      | 5 | 0      |
| 644 | 2 2 -2 -4 4 -4 0 -4 -4 1 0 0 1 -1 1 -1 1 3 -2 0 4      | 5 | 5.2977 | 7 | 0.1778 |
| 645 | 2 2 -2 -4 6 2 -2 -2 2 2 1 1 0 -3 -3 0 -1 1 -2 -2 0     | 2 | 2.3913 | 5 | 0.25   |
| 646 | 2 2 -2 -2 3 -3 -1 2 2 1 1 2 -1 -1 1 1 -3 -2 -2 0 -1    | 2 | 2.0377 | 4 | 0.1528 |
| 647 | 2 2 4 4 6 -6 4 -4 0 -1 0 0 -1 -2 2 -3 0 -2 -4 -4 0     | 1 | 1      | 3 | 0      |
| 648 | 2 3 -3 -2 3 -3 -2 -5 -3 2 -1 2 -2 1 2 0 1 1 -2 0 5     | 7 | 7      | 9 | 0      |
| 649 | 2 3 3 2 -5 5 4 1 -4 -2 1 0 0 1 -1 -2 -2 0 -5 -2 0      | 2 | 2      | 4 | 0      |
| 650 | 2 3 3 6 5 -6 6 -5 1 0 0 1 -2 -1 2 -4 1 -2 -5 -5 -1     | 2 | 2      | 4 | 0      |
| 651 | 2 3 4 5 -5 5 5 2 -5 -1 1 -1 -1 1 -1 -4 -3 1 -5 -5 0    | 1 | 1      | 3 | 0      |
| 652 | 2 4 4 6 2 -4 6 -6 4 0 0 -1 -4 -2 1 -2 2 -1 -6 -2 -4    | 1 | 1      | 3 | 0      |
| 653 | 2 4 4 6 4 -4 6 -6 2 0 0 -1 -4 -2 1 -2 2 -1 -6 -4 -2    | 1 | 1      | 3 | 0      |
| 654 | 2 4 5 3 7 -5 3 -3 0 -2 -1 -1 -2 -3 1 -1 -1 -1 -5 -3 0  | 0 | 0      | 2 | 0      |
| 655 | 2 5 5 6 3 -5 6 -6 3 0 -1 -2 -4 -2 2 -2 2 -1 -7 -2 -3   | 1 | 1.0318 | 3 | 0.2291 |
| 656 | 2 5 7 6 5 -7 4 -5 3 -2 -1 -4 -4 -4 4 0 1 -1 -7 0 -2    | 2 | 2      | 4 | 0      |
| 657 | 2 6 6 4 -6 10 4 0 -4 -3 -1 -2 -3 1 -4 -1 -1 -2 -6 -4 0 | 0 | 0      | 3 | 0      |
| 658 | 2 6 6 6 4 -6 6 -6 4 0 -2 -3 -4 -2 3 -2 2 -1 -8 -2 -4   | 1 | 1.0391 | 3 | 0.2249 |
| 659 | 2 7 7 6 5 -7 6 -7 5 0 -3 -4 -4 -2 4 -2 3 -1 -9 -2 -4   | 2 | 2.0527 | 4 | 0.2253 |
| 660 | 2 7 7 9 4 -6 9 -9 5 1 -1 -3 -6 -3 2 -3 3 -2 -9 -4 -5   | 1 | 1.1066 | 4 | 0.2276 |
| 661 | 3 1 -4 -3 3 -3 -3 -5 -5 1 -1 3 -1 1 1 -1 1 2 0 0 5     | 7 | 7      | 9 | 0      |
| 662 | 3 2 5 3 6 -6 4 -4 -1 -2 0 -1 -1 -2 2 -2 0 -1 -5 -3 0   | 1 | 1.0502 | 3 | 0.234  |
| 663 | 3 3 -3 -7 8 -4 -2 4 6 3 2 3 1 -2 1 -1 -6 -3 -3 0 -4    | 5 | 5      | 8 | 0      |
| 664 | 3 3 -3 -4 8 4 -3 -3 3 2 1 1 -1 -4 -5 1 -1 2 -3 -4 0    | 2 | 2.6847 | 6 | 0.25   |
| 665 | 3 4 -4 -5 5 -5 0 -5 -5 1 -1 1 1 -1 1 -1 1 4 -3 0 5     | 7 | 7.0992 | 9 | 0.1211 |
| 666 | 4 4 8 6 10 -8 6 -6 0 -3 0 -2 -3 -4 2 -3 0 -2 -8 -6 0   | 0 | 0.1712 | 3 | 0.21   |
| 667 | 4 6 5 9 7 -9 9 -7 2 -1 -1 1 -3 -1 3 -6 1 -3 -9 -7 -2   | 2 | 2      | 5 | 0      |
| 668 | 0 0 0 0 0 0 0 0 0 0 -1 -1 -1 0 1 1 1 0 0 0 0           | 0 | 0      | 2 | 0      |
